# Supplementary material for: Novel lung imaging biomarkers and skin gene expression subsetting in dasatinib treatment of systemic sclerosis-associated interstitial lung disease
Source: PLoS One. 2017 Nov 9;12(11):e0187580. doi: 10.1371/journal.pone.0187580 (PMC5679625; doi:10.1371/journal.pone.0187580)
Supplement: S8 Table — Probe IDs in first column are color-coded according to the subset with which they are associated: inflammatory–purple, normal-like–green, fibroproliferative–red. (XLSX) [file pone.0187580.s010.xlsx]

## Sheet: Sheet1
PROBE	ANNOTATION
203974_at	HDHD1A|haloacid dehalogenase-like hydrolase domain containing 1A
211525_s_at	GP5|glycoprotein V (platelet)
201645_at	TNC|tenascin C (hexabrachion)
200906_s_at	PALLD|palladin, cytoskeletal associated protein
200897_s_at	PALLD|palladin, cytoskeletal associated protein
200907_s_at	PALLD|palladin, cytoskeletal associated protein
209125_at	KRT6A /// KRT6C /// KRT6E|keratin 6A /// keratin 6C /// keratin 6E
214580_x_at	KRT6A /// KRT6B /// KRT6C /// KRT6E|keratin 6A /// keratin 6B /// keratin 6C /// keratin 6E
207453_s_at	DNAJB5|DnaJ (Hsp40) homolog, subfamily B, member 5
207390_s_at	SMTN|smoothelin
209596_at	MXRA5|matrix-remodelling associated 5
208539_x_at	SPRR2B|small proline-rich protein 2B
202411_at	IFI27|interferon, alpha-inducible protein 27
205330_at	MN1|meningioma (disrupted in balanced translocation) 1
202446_s_at	PLSCR1|phospholipid scramblase 1
204415_at	IFI6|interferon, alpha-inducible protein 6
204972_at	OAS2|2'-5'-oligoadenylate synthetase 2, 69/71kDa
204439_at	IFI44L|interferon-induced protein 44-like
214059_at	IFI44|Interferon-induced protein 44
222347_at	LOC644450|hypothetical protein LOC644450
218368_s_at	TNFRSF12A|tumor necrosis factor receptor superfamily, member 12A
208975_s_at	KPNB1|karyopherin (importin) beta 1
213507_s_at	KPNB1|karyopherin (importin) beta 1
218887_at	MRPL2|mitochondrial ribosomal protein L2
217761_at	ADI1|acireductone dioxygenase 1
218164_at	SPATA20|spermatogenesis associated 20
210910_s_at	ZP3 /// POMZP3|zona pellucida glycoprotein 3 (sperm receptor) /// POM (POM121 homolog, rat) and ZP3 fusion
204148_s_at	ZP3 /// POMZP3|zona pellucida glycoprotein 3 (sperm receptor) /// POM (POM121 homolog, rat) and ZP3 fusion
217232_x_at	HBB|hemoglobin, beta
209116_x_at	HBB|hemoglobin, beta /// hemoglobin, beta
211696_x_at	HBB|hemoglobin, beta /// hemoglobin, beta
214414_x_at	HBA2|hemoglobin, alpha 2 /// hemoglobin, alpha 2
211745_x_at	HBA1|hemoglobin, alpha 1 /// hemoglobin, alpha 1
211699_x_at	HBA1 /// HBA2|hemoglobin, alpha 1 /// hemoglobin, alpha 1 /// hemoglobin, alpha 2 /// hemoglobin, alpha 2
209458_x_at	HBA1 /// HBA2|hemoglobin, alpha 1 /// hemoglobin, alpha 1 /// hemoglobin, alpha 2 /// hemoglobin, alpha 2
204018_x_at	HBA1 /// HBA2|hemoglobin, alpha 1 /// hemoglobin, alpha 1 /// hemoglobin, alpha 2 /// hemoglobin, alpha 2
217414_x_at	HBA1 /// HBA2|hemoglobin, alpha 1 /// hemoglobin, alpha 2
200790_at	ODC1|ornithine decarboxylase 1
203955_at	KIAA0649|KIAA0649
33767_at	NEFH|neurofilament, heavy polypeptide 200kDa
209645_s_at	ALDH1B1|aldehyde dehydrogenase 1 family, member B1
200621_at	CSRP1|cysteine and glycine-rich protein 1
201058_s_at	MYL9|myosin, light polypeptide 9, regulatory
204083_s_at	TPM2|tropomyosin 2 (beta)
202555_s_at	MYLK|myosin, light polypeptide kinase /// myosin, light polypeptide kinase
206028_s_at	MERTK|c-mer proto-oncogene tyrosine kinase
211913_s_at	MERTK|c-mer proto-oncogene tyrosine kinase /// c-mer proto-oncogene tyrosine kinase
218322_s_at	ACSL5|acyl-CoA synthetase long-chain family member 5
205551_at	SV2B|synaptic vesicle glycoprotein 2B
203658_at	SLC25A20|solute carrier family 25 (carnitine/acylcarnitine translocase), member 20
201941_at	CPD|carboxypeptidase D
212771_at	C10ORF38|chromosome 10 open reading frame 38
205499_at	SRPX2|sushi-repeat-containing protein, X-linked 2
207071_s_at	ACO1|aconitase 1, soluble
208788_at	ELOVL5|ELOVL family member 5, elongation of long chain fatty acids (FEN1/Elo2, SUR4/Elo3-like, yeast)
202003_s_at	ACAA2|acetyl-Coenzyme A acyltransferase 2 (mitochondrial 3-oxoacyl-Coenzyme A thiolase)
212224_at	ALDH1A1|aldehyde dehydrogenase 1 family, member A1
201307_at	41893|septin 11
209207_s_at	SEC22B|SEC22 vesicle trafficking protein homolog B (S. cerevisiae)
200617_at	KIAA0152|KIAA0152
200616_s_at	KIAA0152|KIAA0152
217983_s_at	RNASET2|ribonuclease T2
203562_at	FEZ1|fasciculation and elongation protein zeta 1 (zygin I)
213836_s_at	WIPI1|WD repeat domain, phosphoinositide interacting 1
207547_s_at	FAM107A|family with sequence similarity 107, member A
205862_at	GREB1|GREB1 protein
217867_x_at	BACE2|beta-site APP-cleaving enzyme 2
206981_at	SCN4A|sodium channel, voltage-gated, type IV, alpha
214434_at	HSPA12A|heat shock 70kDa protein 12A
208607_s_at	SAA1 /// SAA2|serum amyloid A1 /// serum amyloid A1 /// serum amyloid A2 /// serum amyloid A2
214456_x_at	SAA1|serum amyloid A1
219454_at	EGFL6|EGF-like-domain, multiple 6
210580_x_at	SULT1A3 /// SULT1A4|sulfotransferase family, cytosolic, 1A, phenol-preferring, member 3 /// sulfotransferase family, cytosolic, 1A, phenol-preferring, member 4
209607_x_at	SULT1A3 /// SULT1A4 /// LOC648394|sulfotransferase family, cytosolic, 1A, phenol-preferring, member 3 /// sulfotransferase family, cytosolic, 1A, phenol-preferring, member 4 /// similar to sulfotransferase family, cytosolic, 1A, phenol-preferring, member 3
215299_x_at	SULT1A1|sulfotransferase family, cytosolic, 1A, phenol-preferring, member 1
203615_x_at	SULT1A1|sulfotransferase family, cytosolic, 1A, phenol-preferring, member 1
210519_s_at	NQO1|NAD(P)H dehydrogenase, quinone 1
201467_s_at	NQO1|NAD(P)H dehydrogenase, quinone 1
212736_at	C16ORF45|chromosome 16 open reading frame 45
203337_x_at	ITGB1BP1|integrin beta 1 binding protein 1
215001_s_at	GLUL|glutamate-ammonia ligase (glutamine synthetase)
217202_s_at	GLUL|glutamate-ammonia ligase (glutamine synthetase)
200648_s_at	GLUL|glutamate-ammonia ligase (glutamine synthetase)
221796_at	NTRK2|neurotrophic tyrosine kinase, receptor, type 2
221795_at	NTRK2|neurotrophic tyrosine kinase, receptor, type 2
214680_at	NTRK2|neurotrophic tyrosine kinase, receptor, type 2
210824_at	---|---
201060_x_at	STOM|stomatin
201061_s_at	STOM|stomatin
211612_s_at	IL13RA1|interleukin 13 receptor, alpha 1 /// interleukin 13 receptor, alpha 1
201888_s_at	IL13RA1|interleukin 13 receptor, alpha 1
201887_at	IL13RA1|interleukin 13 receptor, alpha 1
205729_at	OSMR|oncostatin M receptor
213819_s_at	FLOT1|Flotillin 1
211404_s_at	APLP2|amyloid beta (A4) precursor-like protein 2
214875_x_at	APLP2|amyloid beta (A4) precursor-like protein 2
208702_x_at	APLP2|amyloid beta (A4) precursor-like protein 2
208701_at	APLP2|Amyloid beta (A4) precursor-like protein 2
208703_s_at	APLP2|amyloid beta (A4) precursor-like protein 2
208248_x_at	APLP2|amyloid beta (A4) precursor-like protein 2
218983_at	C1RL|complement component 1, r subcomponent-like
218335_x_at	TNIP2|TNFAIP3 interacting protein 2
48531_at	TNIP2|TNFAIP3 interacting protein 2
200001_at	CAPNS1|calpain, small subunit 1 /// calpain, small subunit 1
200736_s_at	GPX1|glutathione peroxidase 1
209716_at	CSF1|colony stimulating factor 1 (macrophage)
201315_x_at	IFITM2|interferon induced transmembrane protein 2 (1-8D)
201601_x_at	IFITM1|interferon induced transmembrane protein 1 (9-27)
214022_s_at	IFITM1|interferon induced transmembrane protein 1 (9-27)
212203_x_at	IFITM3|interferon induced transmembrane protein 3 (1-8U)
216565_x_at	---|---
200838_at	CTSB|cathepsin B
200839_s_at	CTSB|cathepsin B
201206_s_at	RRBP1|ribosome binding protein 1 homolog 180kDa (dog)
213495_s_at	RRBP1|Ribosome binding protein 1 homolog 180kDa (dog)
201954_at	ARPC1B /// LOC653888|actin related protein 2/3 complex, subunit 1B, 41kDa /// similar to Actin-related protein 2/3 complex subunit 1B (ARP2/3 complex 41 kDa subunit) (p41-ARC)
209762_x_at	SP110|SP110 nuclear body protein
208636_at	ACTN1|actinin, alpha 1
208637_x_at	ACTN1|actinin, alpha 1
211160_x_at	ACTN1|actinin, alpha 1
215706_x_at	ZYX|zyxin
200808_s_at	ZYX|zyxin
203370_s_at	PDLIM7|PDZ and LIM domain 7 (enigma)
211474_s_at	SERPINB6|serpin peptidase inhibitor, clade B (ovalbumin), member 6
212647_at	RRAS|related RAS viral (r-ras) oncogene homolog
219561_at	COPZ2|coatomer protein complex, subunit zeta 2
210276_s_at	TRIOBP|TRIO and F-actin binding protein
200618_at	LASP1|LIM and SH3 protein 1
218084_x_at	FXYD5|FXYD domain containing ion transport regulator 5
200709_at	FKBP1A|FK506 binding protein 1A, 12kDa
214119_s_at	FKBP1A|FK506 binding protein 1A, 12kDa
200923_at	LGALS3BP|lectin, galactoside-binding, soluble, 3 binding protein
AFFX-HSAC07/X00351_M_at	ACTB|actin, beta
AFFX-HSAC07/X00351_5_at	ACTB|actin, beta
200801_x_at	ACTB|actin, beta
AFFX-HSAC07/X00351_3_at	ACTB|actin, beta
201700_at	CCND3|cyclin D3
201289_at	CYR61|cysteine-rich, angiogenic inducer, 61
210764_s_at	CYR61|cysteine-rich, angiogenic inducer, 61
201537_s_at	DUSP3|dual specificity phosphatase 3 (vaccinia virus phosphatase VH1-related)
221541_at	CRISPLD2|cysteine-rich secretory protein LCCL domain containing 2
209875_s_at	SPP1|secreted phosphoprotein 1 (osteopontin, bone sialoprotein I, early T-lymphocyte activation 1)
201847_at	LIPA|lipase A, lysosomal acid, cholesterol esterase (Wolman disease)
206710_s_at	EPB41L3|erythrocyte membrane protein band 4.1-like 3
209295_at	TNFRSF10B|tumor necrosis factor receptor superfamily, member 10b
202990_at	PYGL|phosphorylase, glycogen; liver (Hers disease, glycogen storage disease type VI)
204284_at	PPP1R3C|protein phosphatase 1, regulatory (inhibitor) subunit 3C
222305_at	HK2|hexokinase 2
209191_at	TUBB6|tubulin, beta 6
200625_s_at	CAP1|CAP, adenylate cyclase-associated protein 1 (yeast)
219183_s_at	PSCD4|pleckstrin homology, Sec7 and coiled-coil domains 4
220187_at	STEAP4|STEAP family member 4
218113_at	TMEM2|transmembrane protein 2
202670_at	MAP2K1|mitogen-activated protein kinase kinase 1
201968_s_at	PGM1|phosphoglucomutase 1
218018_at	PDXK|pyridoxal (pyridoxine, vitamin B6) kinase
208858_s_at	FAM62A|family with sequence similarity 62 (C2 domain containing), member A
218784_s_at	C6ORF64|chromosome 6 open reading frame 64
203555_at	PTPN18|protein tyrosine phosphatase, non-receptor type 18 (brain-derived)
204626_s_at	ITGB3|integrin, beta 3 (platelet glycoprotein IIIa, antigen CD61)
204627_s_at	ITGB3|integrin, beta 3 (platelet glycoprotein IIIa, antigen CD61)
204628_s_at	ITGB3|integrin, beta 3 (platelet glycoprotein IIIa, antigen CD61)
211856_x_at	CD28|CD28 molecule
221058_s_at	CKLF|chemokine-like factor
206244_at	CR1|complement component (3b/4b) receptor 1 (Knops blood group)
220358_at	SNFT|Jun dimerization protein p21SNFT
203197_s_at	C1ORF123|chromosome 1 open reading frame 123
222162_s_at	ADAMTS1|ADAM metallopeptidase with thrombospondin type 1 motif, 1
200006_at	PARK7|Parkinson disease (autosomal recessive, early onset) 7 /// Parkinson disease (autosomal recessive, early onset) 7
201554_x_at	GYG1|glycogenin 1
211275_s_at	GYG1|glycogenin 1
208919_s_at	NADK|NAD kinase
218358_at	CRELD2|cysteine-rich with EGF-like domains 2
221245_s_at	C2ORF31|chromosome 2 open reading frame 31 /// chromosome 2 open reading frame 31
218032_at	SNN|stannin
218224_at	PNMA1|paraneoplastic antigen MA1
204518_s_at	PPIC|peptidylprolyl isomerase C (cyclophilin C)
200755_s_at	CALU|calumenin
214845_s_at	CALU|calumenin
201096_s_at	ARF4|ADP-ribosylation factor 4
204682_at	LTBP2|latent transforming growth factor beta binding protein 2
201110_s_at	THBS1|thrombospondin 1
201108_s_at	THBS1|thrombospondin 1
201109_s_at	THBS1|thrombospondin 1
209101_at	CTGF|connective tissue growth factor
203650_at	PROCR|protein C receptor, endothelial (EPCR)
212256_at	GALNT10|UDP-N-acetyl-alpha-D-galactosamine:polypeptide N-acetylgalactosaminyltransferase 10 (GalNAc-T10)
211620_x_at	RUNX1|runt-related transcription factor 1 (acute myeloid leukemia 1; aml1 oncogene) /// runt-related transcription factor 1 (acute myeloid leukemia 1; aml1 oncogene)
211182_x_at	RUNX1|runt-related transcription factor 1 (acute myeloid leukemia 1; aml1 oncogene)
211181_x_at	RUNX1|runt-related transcription factor 1 (acute myeloid leukemia 1; aml1 oncogene)
202458_at	PRSS23|protease, serine, 23
221253_s_at	TXNDC5|thioredoxin domain containing 5 /// thioredoxin domain containing 5
208683_at	CAPN2|calpain 2, (m/II) large subunit
204041_at	MAOB|monoamine oxidase B
202796_at	SYNPO|synaptopodin
213004_at	ANGPTL2|angiopoietin-like 2
213001_at	ANGPTL2|angiopoietin-like 2
219514_at	ANGPTL2|angiopoietin-like 2
208749_x_at	FLOT1|flotillin 1
210142_x_at	FLOT1|flotillin 1
209183_s_at	C10ORF10|chromosome 10 open reading frame 10
219622_at	RAB20|RAB20, member RAS oncogene family
201666_at	TIMP1|TIMP metallopeptidase inhibitor 1
202237_at	NNMT|nicotinamide N-methyltransferase
202238_s_at	NNMT|nicotinamide N-methyltransferase
212067_s_at	C1R /// LOC643676|complement component 1, r subcomponent /// similar to Complement C1r subcomponent precursor (Complement component 1, r subcomponent)
200986_at	SERPING1|serpin peptidase inhibitor, clade G (C1 inhibitor), member 1, (angioedema, hereditary)
204955_at	SRPX|sushi-repeat-containing protein, X-linked
202087_s_at	CTSL|cathepsin L
215049_x_at	CD163|CD163 molecule
203645_s_at	CD163|CD163 molecule
203649_s_at	PLA2G2A|phospholipase A2, group IIA (platelets, synovial fluid)
208747_s_at	C1S|complement component 1, s subcomponent
217767_at	C3 /// LOC653879|complement component 3 /// similar to Complement C3 precursor
210495_x_at	FN1|fibronectin 1
211719_x_at	FN1|fibronectin 1 /// fibronectin 1
212464_s_at	FN1|fibronectin 1
216442_x_at	FN1|fibronectin 1
214701_s_at	FN1|fibronectin 1
217733_s_at	TMSB10|thymosin, beta 10
201508_at	IGFBP4|insulin-like growth factor binding protein 4
213869_x_at	THY1|Thy-1 cell surface antigen
208851_s_at	THY1|Thy-1 cell surface antigen
208850_s_at	THY1|Thy-1 cell surface antigen
200871_s_at	PSAP|prosaposin (variant Gaucher disease and variant metachromatic leukodystrophy)
210042_s_at	CTSZ|cathepsin Z
200663_at	CD63|CD63 molecule
201272_at	AKR1B1|aldo-keto reductase family 1, member B1 (aldose reductase)
202283_at	SERPINF1|serpin peptidase inhibitor, clade F (alpha-2 antiplasmin, pigment epithelium derived factor), member 1
202016_at	MEST|mesoderm specific transcript homolog (mouse)
208792_s_at	CLU|clusterin
208791_at	CLU|clusterin
203059_s_at	PAPSS2|3'-phosphoadenosine 5'-phosphosulfate synthase 2
200748_s_at	FTH1|ferritin, heavy polypeptide 1
212788_x_at	FTL|ferritin, light polypeptide
213813_x_at	FTL|Ferritin, light polypeptide
214439_x_at	BIN1|bridging integrator 1
211628_x_at	FTHP1|ferritin, heavy polypeptide pseudogene 1 /// ferritin, heavy polypeptide pseudogene 1
211776_s_at	EPB41L3|erythrocyte membrane protein band 4.1-like 3 /// erythrocyte membrane protein band 4.1-like 3
212681_at	EPB41L3|erythrocyte membrane protein band 4.1-like 3
221485_at	B4GALT5|UDP-Gal:betaGlcNAc beta 1,4- galactosyltransferase, polypeptide 5
212993_at	---|MRNA; cDNA DKFZp667B1718 (from clone DKFZp667B1718)
202998_s_at	LOXL2|lysyl oxidase-like 2
212335_at	GNS|glucosamine (N-acetyl)-6-sulfatase (Sanfilippo disease IIID)
212334_at	GNS|glucosamine (N-acetyl)-6-sulfatase (Sanfilippo disease IIID)
210740_s_at	ITPK1|inositol 1,3,4-triphosphate 5/6 kinase
203676_at	GNS|glucosamine (N-acetyl)-6-sulfatase (Sanfilippo disease IIID)
204436_at	PLEKHQ1|pleckstrin homology domain containing, family Q member 1
201641_at	BST2|bone marrow stromal cell antigen 2
221087_s_at	APOL3|apolipoprotein L, 3
209546_s_at	APOL1|apolipoprotein L, 1
219716_at	APOL6|apolipoprotein L, 6
202291_s_at	MGP|matrix Gla protein
203666_at	CXCL12|chemokine (C-X-C motif) ligand 12 (stromal cell-derived factor 1)
201162_at	IGFBP7|insulin-like growth factor binding protein 7
201163_s_at	IGFBP7|insulin-like growth factor binding protein 7
217757_at	A2M|alpha-2-macroglobulin
202878_s_at	CD93|CD93 molecule
203477_at	COL15A1|collagen, type XV, alpha 1
212012_at	PXDN|peroxidasin homolog (Drosophila)
211981_at	COL4A1|collagen, type IV, alpha 1
211980_at	COL4A1|collagen, type IV, alpha 1
203934_at	KDR|kinase insert domain receptor (a type III receptor tyrosine kinase)
213541_s_at	ERG|v-ets erythroblastosis virus E26 oncogene like (avian)
204642_at	EDG1|endothelial differentiation, sphingolipid G-protein-coupled receptor, 1
208982_at	PECAM1|Platelet/endothelial cell adhesion molecule (CD31 antigen)
208983_s_at	PECAM1|platelet/endothelial cell adhesion molecule (CD31 antigen)
208981_at	PECAM1|platelet/endothelial cell adhesion molecule (CD31 antigen)
202112_at	VWF|von Willebrand factor
208460_at	GJA7|gap junction protein, alpha 7, 45kDa (connexin 45)
212822_at	HEG1|HEG homolog 1 (zebrafish)
213069_at	HEG1|HEG homolog 1 (zebrafish)
208944_at	TGFBR2|transforming growth factor, beta receptor II (70/80kDa)
207334_s_at	TGFBR2|transforming growth factor, beta receptor II (70/80kDa)
210139_s_at	PMP22|peripheral myelin protein 22
215388_s_at	CFH /// CFHR1|complement factor H /// complement factor H-related 1
205991_s_at	PRRX1|paired related homeobox 1
208782_at	FSTL1|follistatin-like 1
202765_s_at	FBN1|fibrillin 1
207092_at	LEP|leptin (obesity homolog, mouse)
204042_at	WASF3|WAS protein family, member 3
206488_s_at	CD36|CD36 molecule (thrombospondin receptor)
209555_s_at	CD36|CD36 molecule (thrombospondin receptor)
203980_at	FABP4|fatty acid binding protein 4, adipocyte
207175_at	ADIPOQ|adiponectin, C1Q and collagen domain containing
213524_s_at	G0S2|G0/G1switch 2
205913_at	PLIN|perilipin
203548_s_at	LPL|lipoprotein lipase
215695_s_at	GYG2|glycogenin 2
219398_at	CIDEC|cell death-inducing DFFA-like effector c
219064_at	ITIH5|inter-alpha (globulin) inhibitor H5
209763_at	CHRDL1|chordin-like 1
219295_s_at	PCOLCE2|procollagen C-endopeptidase enhancer 2
209869_at	ADRA2A|adrenergic, alpha-2A-, receptor /// adrenergic, alpha-2A-, receptor
209087_x_at	MCAM|melanoma cell adhesion molecule
211340_s_at	MCAM|melanoma cell adhesion molecule
211819_s_at	SORBS1|sorbin and SH3 domain containing 1
209542_x_at	IGF1|insulin-like growth factor 1 (somatomedin C)
204894_s_at	AOC3|amine oxidase, copper containing 3 (vascular adhesion protein 1)
209581_at	HRASLS3|HRAS-like suppressor 3
218665_at	FZD4|frizzled homolog 4 (Drosophila)
209612_s_at	ADH1B|alcohol dehydrogenase IB (class I), beta polypeptide
209613_s_at	ADH1B|alcohol dehydrogenase IB (class I), beta polypeptide
202598_at	S100A13|S100 calcium binding protein A13
203329_at	PTPRM|protein tyrosine phosphatase, receptor type, M
209487_at	RBPMS|RNA binding protein with multiple splicing
209488_s_at	RBPMS|RNA binding protein with multiple splicing
217890_s_at	PARVA|parvin, alpha
222116_s_at	TBC1D16|TBC1 domain family, member 16
201578_at	PODXL|podocalyxin-like
218574_s_at	LMCD1|LIM and cysteine-rich domains 1
201148_s_at	TIMP3|TIMP metallopeptidase inhibitor 3 (Sorsby fundus dystrophy, pseudoinflammatory)
201147_s_at	TIMP3|TIMP metallopeptidase inhibitor 3 (Sorsby fundus dystrophy, pseudoinflammatory)
201150_s_at	TIMP3|TIMP metallopeptidase inhibitor 3 (Sorsby fundus dystrophy, pseudoinflammatory)
222043_at	CLU|clusterin
218805_at	GIMAP5|GTPase, IMAP family member 5 /// GTPase, IMAP family member 5
202806_at	DBN1|drebrin 1
218678_at	NES|nestin
219155_at	PITPNC1|phosphatidylinositol transfer protein, cytoplasmic 1
209897_s_at	SLIT2|slit homolog 2 (Drosophila)
221529_s_at	PLVAP|plasmalemma vesicle associated protein
209047_at	AQP1|aquaporin 1 (Colton blood group)
208335_s_at	DARC|Duffy blood group, chemokine receptor
217728_at	S100A6|S100 calcium binding protein A6 (calcyclin)
201765_s_at	HEXA|hexosaminidase A (alpha polypeptide)
208091_s_at	ECOP|EGFR-coamplified and overexpressed protein /// EGFR-coamplified and overexpressed protein
218345_at	TMEM176A|transmembrane protein 176A
214211_at	FTH1|ferritin, heavy polypeptide 1
202838_at	FUCA1|fucosidase, alpha-L- 1, tissue
201029_s_at	CD99|CD99 molecule
212273_x_at	GNAS|GNAS complex locus
200981_x_at	GNAS|GNAS complex locus
200780_x_at	GNAS|GNAS complex locus
214548_x_at	GNAS|GNAS complex locus
211858_x_at	GNAS|GNAS complex locus
218918_at	MAN1C1|mannosidase, alpha, class 1C, member 1
208970_s_at	UROD|uroporphyrinogen decarboxylase
213340_s_at	KIAA0495|KIAA0495
203439_s_at	STC2|stanniocalcin 2
204306_s_at	CD151|CD151 molecule (Raph blood group)
202027_at	C22ORF5|chromosome 22 open reading frame 5
202931_x_at	BIN1|bridging integrator 1
205204_at	NMB|neuromedin B
210075_at	41700|membrane-associated ring finger (C3HC4) 2
200055_at	TAF10|TAF10 RNA polymerase II, TATA box binding protein (TBP)-associated factor, 30kDa /// TAF10 RNA polymerase II, TATA box binding protein (TBP)-associated factor, 30kDa
221009_s_at	ANGPTL4|angiopoietin-like 4
204785_x_at	IFNAR2|interferon (alpha, beta and omega) receptor 2
217763_s_at	RAB31|RAB31, member RAS oncogene family
217762_s_at	RAB31|RAB31, member RAS oncogene family
203693_s_at	E2F3|E2F transcription factor 3
206571_s_at	MAP4K4|mitogen-activated protein kinase kinase kinase kinase 4
203857_s_at	PDIA5|protein disulfide isomerase family A, member 5
209340_at	UAP1|UDP-N-acteylglucosamine pyrophosphorylase 1
201063_at	RCN1|reticulocalbin 1, EF-hand calcium binding domain
209892_at	FUT4|fucosyltransferase 4 (alpha (1,3) fucosyltransferase, myeloid-specific)
203343_at	UGDH|UDP-glucose dehydrogenase
202422_s_at	ACSL4|acyl-CoA synthetase long-chain family member 4
218181_s_at	MAP4K4|mitogen-activated protein kinase kinase kinase kinase 4
210275_s_at	ZFAND5|zinc finger, AN1-type domain 5
205542_at	STEAP1|six transmembrane epithelial antigen of the prostate 1
205083_at	AOX1|aldehyde oxidase 1
205082_s_at	AOX1|aldehyde oxidase 1
215039_at	LOC339524|Hypothetical protein LOC339524
209541_at	IGF1|insulin-like growth factor 1 (somatomedin C)
204114_at	NID2|nidogen 2 (osteonidogen)
214660_at	PELO|Pelota homolog (Drosophila)
203817_at	---|---
209199_s_at	MEF2C|MADS box transcription enhancer factor 2, polypeptide C (myocyte enhancer factor 2C)
200958_s_at	SDCBP|syndecan binding protein (syntenin)
202158_s_at	CUGBP2|CUG triplet repeat, RNA binding protein 2
217865_at	RNF130|ring finger protein 130
212561_at	RAB6IP1|RAB6 interacting protein 1
212958_x_at	PAM|peptidylglycine alpha-amidating monooxygenase
214620_x_at	PAM|peptidylglycine alpha-amidating monooxygenase
201445_at	CNN3|calponin 3, acidic
221881_s_at	CLIC4|chloride intracellular channel 4
202992_at	C7|complement component 7
212354_at	SULF1|sulfatase 1
212344_at	SULF1|sulfatase 1
206910_x_at	CFHR2|complement factor H-related 2
218901_at	PLSCR4|phospholipid scramblase 4
204047_s_at	PHACTR2|phosphatase and actin regulator 2
219049_at	CHGN|chondroitin beta1,4 N-acetylgalactosaminyltransferase
204719_at	ABCA8|ATP-binding cassette, sub-family A (ABC1), member 8
218541_s_at	C8ORF4|chromosome 8 open reading frame 4
205618_at	PRRG1|proline rich Gla (G-carboxyglutamic acid) 1
219371_s_at	KLF2|Kruppel-like factor 2 (lung)
201859_at	PRG1|proteoglycan 1, secretory granule
218404_at	SNX10|sorting nexin 10
204007_at	FCGR3B|Fc fragment of IgG, low affinity IIIb, receptor (CD16b)
204006_s_at	FCGR3A /// FCGR3B|Fc fragment of IgG, low affinity IIIa, receptor (CD16a) /// Fc fragment of IgG, low affinity IIIb, receptor (CD16b)
206707_x_at	C6ORF32|chromosome 6 open reading frame 32
205033_s_at	DEFA1 /// DEFA3 /// LOC653600|defensin, alpha 1 /// defensin, alpha 3, neutrophil-specific /// similar to Neutrophil defensin 1 precursor (HNP-1) (HP-1) (HP1) (Defensin, alpha 1)
211429_s_at	SERPINA1|serpin peptidase inhibitor, clade A (alpha-1 antiproteinase, antitrypsin), member 1
201288_at	ARHGDIB|Rho GDP dissociation inhibitor (GDI) beta
204174_at	ALOX5AP|arachidonate 5-lipoxygenase-activating protein
216841_s_at	SOD2|superoxide dismutase 2, mitochondrial
215223_s_at	SOD2|superoxide dismutase 2, mitochondrial
205923_at	RELN|reelin
203868_s_at	VCAM1|vascular cell adhesion molecule 1
213975_s_at	LYZ /// LILRB1|lysozyme (renal amyloidosis) /// leukocyte immunoglobulin-like receptor, subfamily B (with TM and ITIM domains), member 1
209906_at	C3AR1|complement component 3a receptor 1
203923_s_at	CYBB|cytochrome b-245, beta polypeptide (chronic granulomatous disease)
205098_at	CCR1|chemokine (C-C motif) receptor 1
204232_at	FCER1G|Fc fragment of IgE, high affinity I, receptor for; gamma polypeptide
203561_at	FCGR2A|Fc fragment of IgG, low affinity IIa, receptor (CD32)
205786_s_at	ITGAM|integrin, alpha M (complement component 3 receptor 3 subunit) /// integrin, alpha M (complement component 3 receptor 3 subunit)
203508_at	TNFRSF1B|tumor necrosis factor receptor superfamily, member 1B
202947_s_at	GYPC|glycophorin C (Gerbich blood group)
221059_s_at	COTL1|coactosin-like 1 (Dictyostelium)
204588_s_at	SLC7A7|solute carrier family 7 (cationic amino acid transporter, y+ system), member 7
212829_at	---|CDNA FLJ13267 fis, clone OVARC1000964 /// CDNA FLJ13267 fis, clone OVARC1000964
215051_x_at	AIF1|allograft inflammatory factor 1
213095_x_at	AIF1|allograft inflammatory factor 1
222088_s_at	SLC2A3|solute carrier family 2 (facilitated glucose transporter), member 3
204619_s_at	CSPG2|chondroitin sulfate proteoglycan 2 (versican)
204620_s_at	CSPG2|chondroitin sulfate proteoglycan 2 (versican)
221731_x_at	CSPG2|chondroitin sulfate proteoglycan 2 (versican)
202663_at	WASPIP|Wiskott-Aldrich syndrome protein interacting protein
203939_at	NT5E|5'-nucleotidase, ecto (CD73)
204438_at	MRC1 /// MRC1L1|mannose receptor, C type 1 /// mannose receptor, C type 1-like 1
203305_at	F13A1|coagulation factor XIII, A1 polypeptide
206407_s_at	CCL13|chemokine (C-C motif) ligand 13
209893_s_at	FUT4|fucosyltransferase 4 (alpha (1,3) fucosyltransferase, myeloid-specific)
208422_at	MSR1|macrophage scavenger receptor 1
202391_at	BASP1|brain abundant, membrane attached signal protein 1
203388_at	ARRB2|arrestin, beta 2
218660_at	DYSF|dysferlin, limb girdle muscular dystrophy 2B (autosomal recessive)
203936_s_at	MMP9|matrix metallopeptidase 9 (gelatinase B, 92kDa gelatinase, 92kDa type IV collagenase)
202729_s_at	LTBP1|latent transforming growth factor beta binding protein 1
202728_s_at	LTBP1|latent transforming growth factor beta binding protein 1
203001_s_at	STMN2|stathmin-like 2
209710_at	GATA2|GATA binding protein 2
205624_at	CPA3|carboxypeptidase A3 (mast cell)
207134_x_at	TPSAB1|tryptase alpha/beta 1
205890_s_at	GABBR1 /// UBD|gamma-aminobutyric acid (GABA) B receptor, 1 /// ubiquitin D
209774_x_at	CXCL2|chemokine (C-X-C motif) ligand 2
202363_at	SPOCK1|sparc/osteonectin, cwcv and kazal-like domains proteoglycan (testican) 1
212230_at	PPAP2B|phosphatidic acid phosphatase type 2B
209355_s_at	PPAP2B|phosphatidic acid phosphatase type 2B
203563_at	AFAP|actin filament associated protein
203139_at	DAPK1|death-associated protein kinase 1
221011_s_at	LBH /// LOC653743|hypothetical protein DKFZp566J091 /// hypothetical protein DKFZp566J091 /// similar to hypothetical protein DKFZp566J091 /// similar to hypothetical protein DKFZp566J091
211380_s_at	PRKG1|protein kinase, cGMP-dependent, type I
201431_s_at	DPYSL3|dihydropyrimidinase-like 3
202436_s_at	CYP1B1|cytochrome P450, family 1, subfamily B, polypeptide 1
202437_s_at	CYP1B1|cytochrome P450, family 1, subfamily B, polypeptide 1
209374_s_at	IGHM|immunoglobulin heavy constant mu
214916_x_at	IGH@ /// IGHA1 /// IGHA2 /// IGHD /// IGHG1 /// IGHG2 /// IGHG3 /// IGHM /// LOC652848|immunoglobulin heavy locus /// immunoglobulin heavy constant alpha 1 /// immunoglobulin heavy constant alpha 2 (A2m marker) /// immunoglobulin heavy constant delta /// immunoglobulin heavy constant gamma 1 (G1m marker) /// immunoglobulin heavy constant gamma 2 (G2m marker) /// immunoglobulin heavy constant gamm…
214428_x_at	C4A /// C4B|complement component 4A (Rodgers blood group) /// complement component 4B (Childo blood group)
208451_s_at	C4A /// C4B|complement component 4A (Rodgers blood group) /// complement component 4B (Childo blood group)
210168_at	C6|complement component 6
213488_at	SNED1|sushi, nidogen and EGF-like domains 1
206697_s_at	HP|haptoglobin
212592_at	IGJ|Immunoglobulin J polypeptide, linker protein for immunoglobulin alpha and mu polypeptides
221671_x_at	IGKC /// IGKV1-5 /// LOC651928|immunoglobulin kappa constant /// immunoglobulin kappa variable 1-5 /// similar to Ig kappa chain V-II region RPMI 6410 precursor
221651_x_at	IGKC /// IGKV1-5 /// LOC651928|immunoglobulin kappa constant /// immunoglobulin kappa variable 1-5 /// similar to Ig kappa chain V-II region RPMI 6410 precursor
214669_x_at	IGKC|Immunoglobulin kappa constant
214677_x_at	IGL@ /// IGLC1 /// IGLC2 /// IGLV4-3 /// IGLV3-25 /// IGLV2-14 /// IGLJ3|immunoglobulin lambda locus /// immunoglobulin lambda constant 1 (Mcg marker) /// immunoglobulin lambda constant 2 (Kern-Oz- marker) /// immunoglobulin lambda variable 4-3 /// immunoglobulin lambda variable 3-25 /// immunoglobulin lambda variable 2-14 /// immunoglobulin lambda joining 3
209138_x_at	IGL@|Immunoglobulin lambda locus
220190_s_at	ALF /// SALF|TFIIA-alpha/beta-like factor /// stoned B/TFIIA-alpha/beta-like factor
219011_at	PLEKHA4|pleckstrin homology domain containing, family A (phosphoinositide binding specific) member 4
203570_at	LOXL1|lysyl oxidase-like 1
213810_s_at	C6ORF166|Chromosome 6 open reading frame 166
201579_at	FAT|FAT tumor suppressor homolog 1 (Drosophila)
214890_s_at	DKFZP564J102|DKFZP564J102 protein
214889_at	DKFZP564J102|DKFZP564J102 protein
221584_s_at	KCNMA1|potassium large conductance calcium-activated channel, subfamily M, alpha member 1
219654_at	PTPLA|protein tyrosine phosphatase-like (proline instead of catalytic arginine), member A
203262_s_at	FAM50A|family with sequence similarity 50, member A
212311_at	KIAA0746|KIAA0746 protein
200677_at	PTTG1IP|pituitary tumor-transforming 1 interacting protein
216873_s_at	ATP8B2|ATPase, Class I, type 8B, member 2
32540_at	PPP3CC|Protein phosphatase 3 (formerly 2B), catalytic subunit, gamma isoform (calcineurin A gamma)
211234_x_at	ESR1|estrogen receptor 1
211990_at	HLA-DPA1|major histocompatibility complex, class II, DP alpha 1
213537_at	HLA-DPA1|major histocompatibility complex, class II, DP alpha 1
210072_at	CCL19|chemokine (C-C motif) ligand 19
214460_at	LSAMP|limbic system-associated membrane protein
212187_x_at	PTGDS|prostaglandin D2 synthase 21kDa (brain)
211748_x_at	PTGDS|prostaglandin D2 synthase 21kDa (brain) /// prostaglandin D2 synthase 21kDa (brain)
203349_s_at	ETV5|ets variant gene 5 (ets-related molecule)
202524_s_at	SPOCK2|sparc/osteonectin, cwcv and kazal-like domains proteoglycan (testican) 2
219795_at	SLC6A14|solute carrier family 6 (amino acid transporter), member 14
202478_at	TRIB2|tribbles homolog 2 (Drosophila)
203700_s_at	DIO2|deiodinase, iodothyronine, type II
204472_at	GEM|GTP binding protein overexpressed in skeletal muscle
204351_at	S100P|S100 calcium binding protein P
212845_at	SAMD4A|sterile alpha motif domain containing 4A
220065_at	TNMD|tenomodulin
204992_s_at	PFN2|profilin 2
204324_s_at	GOLPH4|golgi phosphoprotein 4
218502_s_at	TRPS1|trichorhinophalangeal syndrome I
213868_s_at	DHRS7|Dehydrogenase/reductase (SDR family) member 7
202532_s_at	DHFR /// LOC643509|dihydrofolate reductase /// similar to Dihydrofolate reductase
202620_s_at	PLOD2|procollagen-lysine, 2-oxoglutarate 5-dioxygenase 2
210896_s_at	ASPH|aspartate beta-hydroxylase
209135_at	ASPH|aspartate beta-hydroxylase
204049_s_at	PHACTR2|phosphatase and actin regulator 2
204115_at	GNG11|guanine nucleotide binding protein (G protein), gamma 11
212119_at	RHOQ|ras homolog gene family, member Q
209227_at	---|---
209386_at	TM4SF1|transmembrane 4 L six family member 1
215034_s_at	TM4SF1|transmembrane 4 L six family member 1
209387_s_at	TM4SF1|transmembrane 4 L six family member 1
201116_s_at	CPE|carboxypeptidase E
213122_at	TSPYL5|TSPY-like 5
216037_x_at	TCF7L2|transcription factor 7-like 2 (T-cell specific, HMG-box)
216511_s_at	TCF7L2|transcription factor 7-like 2 (T-cell specific, HMG-box)
212761_at	TCF7L2|transcription factor 7-like 2 (T-cell specific, HMG-box)
209014_at	MAGED1|melanoma antigen family D, 1
201051_at	ANP32A|Acidic (leucine-rich) nuclear phosphoprotein 32 family, member A
219869_s_at	SLC39A8|solute carrier family 39 (zinc transporter), member 8
219572_at	CADPS2|Ca2+-dependent activator protein for secretion 2
203474_at	IQGAP2|IQ motif containing GTPase activating protein 2
218309_at	CAMK2N1|calcium/calmodulin-dependent protein kinase II inhibitor 1
217967_s_at	C1ORF24|chromosome 1 open reading frame 24
216910_at	XPNPEP2|X-prolyl aminopeptidase (aminopeptidase P) 2, membrane-bound
215665_at	LOC440606|similar to dJ871G17.4 (novel 3-beta hydroxysteroid dehydrogenase/isomerase family member)
220914_at	---|MRNA; cDNA DKFZp686I0814 (from clone DKFZp686I0814)
208565_at	MC5R|melanocortin 5 receptor
210503_at	MAGEA11|melanoma antigen family A, 11
222245_s_at	FER1L4|fer-1-like 4 (C. elegans)
214307_at	LOC642252|similar to Homogentisate 1,2-dioxygenase (Homogentisicase) (Homogentisate oxygenase) (Homogentisic acid oxidase)
205311_at	DDC|dopa decarboxylase (aromatic L-amino acid decarboxylase)
206844_at	FBP2|fructose-1,6-bisphosphatase 2
208035_at	GRM6|glutamate receptor, metabotropic 6
207958_at	UGT2A1|UDP glucuronosyltransferase 2 family, polypeptide A1
211766_s_at	PNLIPRP2|pancreatic lipase-related protein 2 /// pancreatic lipase-related protein 2
215100_at	C6ORF105|chromosome 6 open reading frame 105
205248_at	DOPEY2|dopey family member 2
211056_s_at	SRD5A1|steroid-5-alpha-reductase, alpha polypeptide 1 (3-oxo-5 alpha-steroid delta 4-dehydrogenase alpha 1) /// steroid-5-alpha-reductase, alpha polypeptide 1 (3-oxo-5 alpha-steroid delta 4-dehydrogenase alpha 1)
210959_s_at	SRD5A1|steroid-5-alpha-reductase, alpha polypeptide 1 (3-oxo-5 alpha-steroid delta 4-dehydrogenase alpha 1)
204675_at	SRD5A1|steroid-5-alpha-reductase, alpha polypeptide 1 (3-oxo-5 alpha-steroid delta 4-dehydrogenase alpha 1)
214229_at	DNAH17|dynein, axonemal, heavy polypeptide 17
207491_at	MOGAT2|monoacylglycerol O-acyltransferase 2
209806_at	HIST1H2BK|histone 1, H2bk
219975_x_at	OLAH|oleoyl-ACP hydrolase
204375_at	CLSTN3|calsyntenin 3
210653_s_at	BCKDHB|branched chain keto acid dehydrogenase E1, beta polypeptide (maple syrup urine disease)
201120_s_at	PGRMC1|progesterone receptor membrane component 1
211695_x_at	MUC1|mucin 1, cell surface associated /// mucin 1, cell surface associated
207847_s_at	MUC1|mucin 1, cell surface associated
205942_s_at	ACSM3|acyl-CoA synthetase medium-chain family member 3
210377_at	ACSM3|acyl-CoA synthetase medium-chain family member 3
214455_at	HIST1H2BC|histone 1, H2bc
205221_at	HGD /// LOC642252|homogentisate 1,2-dioxygenase (homogentisate oxidase) /// similar to Homogentisate 1,2-dioxygenase (Homogentisicase) (Homogentisate oxygenase) (Homogentisic acid oxidase)
206623_at	PDE6A|phosphodiesterase 6A, cGMP-specific, rod, alpha
222071_s_at	SLCO4C1|solute carrier organic anion transporter family, member 4C1
207596_at	---|---
220435_at	SLC30A10|solute carrier family 30, member 10
207073_at	CDKL2|cyclin-dependent kinase-like 2 (CDC2-related kinase)
210451_at	PKLR|pyruvate kinase, liver and RBC
207156_at	HIST1H2AG|histone 1, H2ag
206143_at	SLC26A3|solute carrier family 26, member 3
208331_at	BPY2 /// BPY2B /// BPY2C|basic charge, Y-linked, 2 /// basic charge, Y-linked, 2B /// basic charge, Y-linked, 2C
205769_at	SLC27A2|solute carrier family 27 (fatty acid transporter), member 2
205768_s_at	SLC27A2|solute carrier family 27 (fatty acid transporter), member 2
215506_s_at	DIRAS3|DIRAS family, GTP-binding RAS-like 3
218507_at	HIG2|hypoxia-inducible protein 2
206463_s_at	DHRS2|dehydrogenase/reductase (SDR family) member 2
214079_at	DHRS2|dehydrogenase/reductase (SDR family) member 2
203576_at	BCAT2|branched chain aminotransferase 2, mitochondrial
205364_at	ACOX2|acyl-Coenzyme A oxidase 2, branched chain
213920_at	CUTL2|cut-like 2 (Drosophila)
210576_at	CYP4F8|cytochrome P450, family 4, subfamily F, polypeptide 8
206466_at	ACSBG1|acyl-CoA synthetase bubblegum family member 1
207858_s_at	PKLR|pyruvate kinase, liver and RBC
215082_at	ELOVL5|ELOVL family member 5, elongation of long chain fatty acids (FEN1/Elo2, SUR4/Elo3-like, yeast)
205380_at	PDZK1|PDZ domain containing 1
220507_s_at	UPB1|ureidopropionase, beta
220801_s_at	HAO2|hydroxyacid oxidase 2 (long chain)
209522_s_at	CRAT|carnitine acetyltransferase
221561_at	SOAT1|sterol O-acyltransferase (acyl-Coenzyme A: cholesterol acyltransferase) 1
204836_at	GLDC|glycine dehydrogenase (decarboxylating)
220615_s_at	MLSTD1|male sterility domain containing 1
206714_at	ALOX15B|arachidonate 15-lipoxygenase, type B
219131_at	UBIAD1|UbiA prenyltransferase domain containing 1
212282_at	TMEM97|transmembrane protein 97
212281_s_at	TMEM97|transmembrane protein 97
212279_at	TMEM97|transmembrane protein 97
205843_x_at	CRAT|carnitine acetyltransferase
210452_x_at	CYP4F2|cytochrome P450, family 4, subfamily F, polypeptide 2
206656_s_at	C20ORF3|chromosome 20 open reading frame 3
221295_at	CIDEA|cell death-inducing DFFA-like effector a
204416_x_at	APOC1|apolipoprotein C-I
201598_s_at	INPPL1|inositol polyphosphate phosphatase-like 1
32836_at	AGPAT1|1-acylglycerol-3-phosphate O-acyltransferase 1 (lysophosphatidic acid acyltransferase, alpha)
215535_s_at	AGPAT1|1-acylglycerol-3-phosphate O-acyltransferase 1 (lysophosphatidic acid acyltransferase, alpha)
202772_at	HMGCL|3-hydroxymethyl-3-methylglutaryl-Coenzyme A lyase (hydroxymethylglutaricaciduria)
207466_at	GAL|galanin
209696_at	FBP1|fructose-1,6-bisphosphatase 1
220431_at	TMPRSS11E /// LOC653057|transmembrane protease, serine 11E /// similar to transmembrane protease, serine 11E
203979_at	CYP27A1|cytochrome P450, family 27, subfamily A, polypeptide 1
202070_s_at	IDH3A|isocitrate dehydrogenase 3 (NAD+) alpha
221932_s_at	GLRX5|glutaredoxin 5 homolog (S. cerevisiae)
213061_s_at	NTAN1|N-terminal asparagine amidase
213062_at	NTAN1|N-terminal asparagine amidase
214719_at	LOC283537|hypothetical protein LOC283537
218676_s_at	PCTP|phosphatidylcholine transfer protein
206214_at	PLA2G7|phospholipase A2, group VII (platelet-activating factor acetylhydrolase, plasma) /// phospholipase A2, group VII (platelet-activating factor acetylhydrolase, plasma)
218035_s_at	FLJ20273|RNA-binding protein
209108_at	TSPAN6|tetraspanin 6
201625_s_at	INSIG1|insulin induced gene 1
201627_s_at	INSIG1|insulin induced gene 1
208964_s_at	FADS1|fatty acid desaturase 1
208963_x_at	FADS1|fatty acid desaturase 1
221142_s_at	PECR|peroxisomal trans-2-enoyl-CoA reductase
200980_s_at	PDHA1|pyruvate dehydrogenase (lipoamide) alpha 1
202427_s_at	BRP44|brain protein 44
215726_s_at	CYB5A|cytochrome b5 type A (microsomal)
209366_x_at	CYB5A|cytochrome b5 type A (microsomal)
207843_x_at	CYB5A|cytochrome b5 type A (microsomal)
202982_s_at	ACOT2 /// ACOT1 /// LOC653878|acyl-CoA thioesterase 2 /// acyl-CoA thioesterase 1 /// similar to Cytosolic acyl coenzyme A thioester hydrolase, inducible (Long chain acyl-CoA thioester hydrolase) (Long chain acyl-CoA hydrolase) (CTE-I) (CTE-Ib)
205161_s_at	PEX11A|peroxisomal biogenesis factor 11A
207275_s_at	ACSL1|acyl-CoA synthetase long-chain family member 1
201963_at	ACSL1|acyl-CoA synthetase long-chain family member 1
210337_s_at	ACLY|ATP citrate lyase
212272_at	LPIN1|lipin 1
203027_s_at	MVD|mevalonate (diphospho) decarboxylase
221669_s_at	ACAD8|acyl-Coenzyme A dehydrogenase family, member 8
207192_at	DNASE1L2|deoxyribonuclease I-like 2
218795_at	ACP6|acid phosphatase 6, lysophosphatidic
201275_at	FDPS|farnesyl diphosphate synthase (farnesyl pyrophosphate synthetase, dimethylallyltranstransferase, geranyltranstransferase)
201790_s_at	DHCR7|7-dehydrocholesterol reductase
201791_s_at	DHCR7|7-dehydrocholesterol reductase
209605_at	TST|thiosulfate sulfurtransferase (rhodanese)
220486_x_at	RP13-360B22.2 /// LOC653522|hypothetical protein FLJ22679 /// similar to hypothetical protein FLJ22679
219428_s_at	PXMP4|peroxisomal membrane protein 4, 24kDa
210130_s_at	TM7SF2|transmembrane 7 superfamily member 2
202025_x_at	ACAA1|acetyl-Coenzyme A acyltransferase 1 (peroxisomal 3-oxoacyl-Coenzyme A thiolase)
214274_s_at	ACAA1|acetyl-Coenzyme A acyltransferase 1 (peroxisomal 3-oxoacyl-Coenzyme A thiolase)
201569_s_at	SAMM50|sorting and assembly machinery component 50 homolog (S. cerevisiae)
201570_at	SAMM50|sorting and assembly machinery component 50 homolog (S. cerevisiae)
207508_at	ATP5G3|ATP synthase, H+ transporting, mitochondrial F0 complex, subunit C3 (subunit 9)
207507_s_at	ATP5G3|ATP synthase, H+ transporting, mitochondrial F0 complex, subunit C3 (subunit 9)
212694_s_at	PCCB|propionyl Coenzyme A carboxylase, beta polypeptide
209279_s_at	NSDHL|NAD(P) dependent steroid dehydrogenase-like
215093_at	NSDHL|NAD(P) dependent steroid dehydrogenase-like
203515_s_at	PMVK|phosphomevalonate kinase
213789_at	---|---
204264_at	CPT2|carnitine palmitoyltransferase II
39729_at	PRDX2|peroxiredoxin 2
211658_at	PRDX2|peroxiredoxin 2 /// peroxiredoxin 2
219723_x_at	AGPAT3|1-acylglycerol-3-phosphate O-acyltransferase 3
201900_s_at	AKR1A1|aldo-keto reductase family 1, member A1 (aldehyde reductase)
218664_at	MECR|mitochondrial trans-2-enoyl-CoA reductase
202929_s_at	DDT|D-dopachrome tautomerase
219076_s_at	PXMP2|peroxisomal membrane protein 2, 22kDa
205944_s_at	CLTCL1|clathrin, heavy polypeptide-like 1
202201_at	BLVRB|biliverdin reductase B (flavin reductase (NADPH))
200710_at	ACADVL|acyl-Coenzyme A dehydrogenase, very long chain
209396_s_at	CHI3L1|chitinase 3-like 1 (cartilage glycoprotein-39)
209395_at	CHI3L1|chitinase 3-like 1 (cartilage glycoprotein-39)
206392_s_at	RARRES1|retinoic acid receptor responder (tazarotene induced) 1
212228_s_at	COQ9|coenzyme Q9 homolog (S. cerevisiae)
218315_s_at	CDK5RAP1|CDK5 regulatory subunit associated protein 1
220675_s_at	PNPLA3|patatin-like phospholipase domain containing 3
215071_s_at	HIST1H2AC|histone 1, H2ac
203260_at	HDDC2|HD domain containing 2
213321_at	BCKDHB|branched chain keto acid dehydrogenase E1, beta polypeptide (maple syrup urine disease)
222010_at	TCP1|t-complex 1
207415_at	PLA2R1|phospholipase A2 receptor 1, 180kDa
210194_at	PLA2R1|phospholipase A2 receptor 1, 180kDa
213805_at	ABHD5|abhydrolase domain containing 5
213935_at	ABHD5|abhydrolase domain containing 5
208463_at	GABRA4|gamma-aminobutyric acid (GABA) A receptor, alpha 4
213738_s_at	ATP5A1|ATP synthase, H+ transporting, mitochondrial F1 complex, alpha subunit 1, cardiac muscle
202539_s_at	HMGCR|3-hydroxy-3-methylglutaryl-Coenzyme A reductase
218739_at	ABHD5|abhydrolase domain containing 5
217775_s_at	RDH11|retinol dehydrogenase 11 (all-trans/9-cis/11-cis)
217776_at	RDH11|retinol dehydrogenase 11 (all-trans/9-cis/11-cis)
209146_at	SC4MOL|sterol-C4-methyl oxidase-like
205822_s_at	HMGCS1|3-hydroxy-3-methylglutaryl-Coenzyme A synthase 1 (soluble)
221750_at	HMGCS1|3-hydroxy-3-methylglutaryl-Coenzyme A synthase 1 (soluble)
222011_s_at	TCP1|t-complex 1
203786_s_at	TPD52L1|tumor protein D52-like 1
202540_s_at	HMGCR|3-hydroxy-3-methylglutaryl-Coenzyme A reductase
209457_at	DUSP5|dual specificity phosphatase 5
211023_at	PDHB|pyruvate dehydrogenase (lipoamide) beta
203781_at	MRPL33|mitochondrial ribosomal protein L33
208911_s_at	PDHB|pyruvate dehydrogenase (lipoamide) beta
200883_at	UQCRC2|ubiquinol-cytochrome c reductase core protein II
212600_s_at	UQCRC2|ubiquinol-cytochrome c reductase core protein II
203971_at	SLC31A1|solute carrier family 31 (copper transporters), member 1
207254_at	SLC15A1|solute carrier family 15 (oligopeptide transporter), member 1
203123_s_at	SLC11A2|solute carrier family 11 (proton-coupled divalent metal ion transporters), member 2
203124_s_at	SLC11A2|solute carrier family 11 (proton-coupled divalent metal ion transporters), member 2
218910_at	TMEM16K|transmembrane protein 16K
210950_s_at	FDFT1|farnesyl-diphosphate farnesyltransferase 1
208647_at	FDFT1|farnesyl-diphosphate farnesyltransferase 1
202562_s_at	C14ORF1|chromosome 14 open reading frame 1
218552_at	ECHDC2|enoyl Coenzyme A hydratase domain containing 2
205999_x_at	CYP3A4|cytochrome P450, family 3, subfamily A, polypeptide 4
208367_x_at	CYP3A4|cytochrome P450, family 3, subfamily A, polypeptide 4
36907_at	MVK|mevalonate kinase (mevalonic aciduria)
203125_x_at	SLC11A2|solute carrier family 11 (proton-coupled divalent metal ion transporters), member 2
218174_s_at	C10ORF57|chromosome 10 open reading frame 57
213289_at	SATL1|Spermidine/spermine N1-acetyl transferase-like 1
214358_at	ACACA|acetyl-Coenzyme A carboxylase alpha
205232_s_at	PAFAH2|platelet-activating factor acetylhydrolase 2, 40kDa
219255_x_at	IL17RB|interleukin 17 receptor B
205233_s_at	PAFAH2|platelet-activating factor acetylhydrolase 2, 40kDa
210387_at	HIST1H2BG|histone 1, H2bg
213497_at	ABTB2|ankyrin repeat and BTB (POZ) domain containing 2
221449_s_at	ITFG1|integrin alpha FG-GAP repeat containing 1 /// integrin alpha FG-GAP repeat containing 1
206870_at	PPARA|peroxisome proliferative activated receptor, alpha
210493_s_at	MFAP3L|microfibrillar-associated protein 3-like
204204_at	SLC31A2|solute carrier family 31 (copper transporters), member 2
215725_at	DGCR11|DiGeorge syndrome critical region gene 11
217636_at	POLG|polymerase (DNA directed), gamma
208181_at	HIST1H4H|histone 1, H4h
206002_at	GPR64|G protein-coupled receptor 64
37793_r_at	RAD51L3|RAD51-like 3 (S. cerevisiae)
211303_x_at	PSMAL|growth-inhibiting protein 26
216778_s_at	CYLC1|cylicin, basic protein of sperm head cytoskeleton 1
206515_at	CYP4F3|cytochrome P450, family 4, subfamily F, polypeptide 3
221605_s_at	PIPOX|pipecolic acid oxidase
203609_s_at	ALDH5A1|aldehyde dehydrogenase 5 family, member A1 (succinate-semialdehyde dehydrogenase)
212875_s_at	C21ORF25|chromosome 21 open reading frame 25
213695_at	PON3|paraoxonase 3
221222_s_at	C1ORF56|chromosome 1 open reading frame 56
218333_at	DERL2|Der1-like domain family, member 2
208918_s_at	NADK|NAD kinase
212314_at	KIAA0746|KIAA0746 protein
208841_s_at	G3BP2|Ras-GTPase activating protein SH3 domain-binding protein 2
201848_s_at	BNIP3|BCL2/adenovirus E1B 19kDa interacting protein 3
214243_s_at	SERHL /// SERHL2 /// LOC651278|serine hydrolase-like /// serine hydrolase-like 2 /// similar to serine hydrolase-like 2
202938_x_at	CTA-126B4.3 /// DJ222E13.2|CGI-96 protein /// similar to CGI-96
217284_x_at	SERHL|serine hydrolase-like
217276_x_at	SERHL2|serine hydrolase-like 2
219860_at	LY6G5C|lymphocyte antigen 6 complex, locus G5C
210115_at	RPL39L|ribosomal protein L39-like
211689_s_at	TMPRSS2|transmembrane protease, serine 2 /// transmembrane protease, serine 2
208359_s_at	KCNJ4|potassium inwardly-rectifying channel, subfamily J, member 4
211116_at	SLC9A2|solute carrier family 9 (sodium/hydrogen exchanger), member 2
208285_at	OR7A5|olfactory receptor, family 7, subfamily A, member 5
217259_at	---|MRNA; cDNA DKFZp586H0123 (from clone DKFZp586H0123)
214097_at	RPS21|ribosomal protein S21
218824_at	FLJ10781|hypothetical protein FLJ10781
209498_at	CEACAM1|carcinoembryonic antigen-related cell adhesion molecule 1 (biliary glycoprotein)
219959_at	MOCOS|molybdenum cofactor sulfurase
217168_s_at	HERPUD1|homocysteine-inducible, endoplasmic reticulum stress-inducible, ubiquitin-like domain member 1
203546_at	IPO13|importin 13
210187_at	FKBP1A|FK506 binding protein 1A, 12kDa
217395_at	MT4|metallothionein IV
204069_at	MEIS1|Meis1, myeloid ecotropic viral integration site 1 homolog (mouse)
210912_x_at	GSTM4|glutathione S-transferase M4
202554_s_at	GSTM3|glutathione S-transferase M3 (brain)
204550_x_at	GSTM1|glutathione S-transferase M1
215333_x_at	GSTM1|glutathione S-transferase M1
204418_x_at	GSTM2|glutathione S-transferase M2 (muscle)
213900_at	C9ORF61|chromosome 9 open reading frame 61
221924_at	DKFZP761I2123|hypothetical protein DKFZp761I2123
202037_s_at	SFRP1|secreted frizzled-related protein 1
202036_s_at	SFRP1|secreted frizzled-related protein 1
51158_at	LOC400451|hypothetical gene supported by AK075564; BC060873
222085_at	LOC400451|Hypothetical gene supported by AK075564; BC060873
204607_at	HMGCS2|3-hydroxy-3-methylglutaryl-Coenzyme A synthase 2 (mitochondrial)
211883_x_at	CEACAM1|carcinoembryonic antigen-related cell adhesion molecule 1 (biliary glycoprotein)
206873_at	CA6|carbonic anhydrase VI
213611_at	AQP5|aquaporin 5
219615_s_at	KCNK5|potassium channel, subfamily K, member 5
201243_s_at	ATP1B1|ATPase, Na+/K+ transporting, beta 1 polypeptide
204404_at	SLC12A2|solute carrier family 12 (sodium/potassium/chloride transporters), member 2
213036_x_at	ATP2A3|ATPase, Ca++ transporting, ubiquitous
207522_s_at	ATP2A3|ATPase, Ca++ transporting, ubiquitous
209016_s_at	KRT7|keratin 7
201596_x_at	KRT18|keratin 18
206348_s_at	PDK3|pyruvate dehydrogenase kinase, isozyme 3
203824_at	TSPAN8|tetraspanin 8
206509_at	PIP|prolactin-induced protein
216359_at	MUC7|mucin 7, secreted
217059_at	MUC7|mucin 7, secreted
212560_at	C11ORF32|chromosome 11 open reading frame 32
203509_at	SORL1|sortilin-related receptor, L(DLR class) A repeats-containing
204713_s_at	F5|coagulation factor V (proaccelerin, labile factor)
205632_s_at	PIP5K1B|phosphatidylinositol-4-phosphate 5-kinase, type I, beta
218872_at	TESC|tescalcin
206777_s_at	CRYBB2|crystallin, beta B2
219749_at	SH2D4A|SH2 domain containing 4A
210247_at	SYN2|synapsin II
203673_at	TG|thyroglobulin
221675_s_at	CHPT1|choline phosphotransferase 1
205291_at	IL2RB|interleukin 2 receptor, beta /// interleukin 2 receptor, beta
201582_at	SEC23B|Sec23 homolog B (S. cerevisiae)
218966_at	MYO5C|myosin VC
219511_s_at	SNCAIP|synuclein, alpha interacting protein (synphilin)
206089_at	NELL1|NEL-like 1 (chicken)
213017_at	ABHD3|abhydrolase domain containing 3
222098_s_at	MZF1|myeloid zinc finger 1
219629_at	FAM118A|family with sequence similarity 118, member A
202888_s_at	ANPEP|alanyl (membrane) aminopeptidase (aminopeptidase N, aminopeptidase M, microsomal aminopeptidase, CD13, p150)
213924_at	MPPE1|Metallophosphoesterase 1
206356_s_at	GNAL|guanine nucleotide binding protein (G protein), alpha activating activity polypeptide, olfactory type
206355_at	GNAL|guanine nucleotide binding protein (G protein), alpha activating activity polypeptide, olfactory type
214071_at	MPPE1|Metallophosphoesterase 1
215625_at	LOC51152 /// LOC642321 /// LOC644404 /// LOC644433 /// LOC644450 /// LOC644488 /// LOC644530|melanoma antigen /// hypothetical protein LOC642321 /// hypothetical protein LOC644404 /// hypothetical protein LOC644433 /// hypothetical protein LOC644450 /// hypothetical protein LOC644488 /// hypothetical protein LOC644530
201646_at	SCARB2|scavenger receptor class B, member 2
218696_at	EIF2AK3|eukaryotic translation initiation factor 2-alpha kinase 3
217639_at	---|Transcribed locus
203196_at	ABCC4|ATP-binding cassette, sub-family C (CFTR/MRP), member 4
217506_at	LOC400642|Hypothetical gene supported by BC041875; BX648984
209658_at	CDC16|CDC16 cell division cycle 16 homolog (S. cerevisiae)
202717_s_at	CDC16|CDC16 cell division cycle 16 homolog (S. cerevisiae)
209659_s_at	CDC16|CDC16 cell division cycle 16 homolog (S. cerevisiae)
207626_s_at	SLC7A2|solute carrier family 7 (cationic amino acid transporter, y+ system), member 2
215974_at	HCG4P6|HLA complex group 4 pseudogene 6
213873_at	---|---
211509_s_at	RTN4|reticulon 4
214629_x_at	RTN4|reticulon 4
210968_s_at	RTN4|reticulon 4
212999_x_at	HLA-DQB1 /// LOC650557|major histocompatibility complex, class II, DQ beta 1 /// major histocompatibility complex, class II, DQ beta 1 /// similar to HLA class II histocompatibility antigen, DQ(W1.1) beta chain precursor (DQB1*0501) /// similar to HLA class II histocompatibility antigen, DQ(W1.1) beta chain precursor (DQB1*0501)
219759_at	LRAP|leukocyte-derived arginine aminopeptidase
213831_at	HLA-DQA1|major histocompatibility complex, class II, DQ alpha 1
209480_at	HLA-DQB1|major histocompatibility complex, class II, DQ beta 1 /// major histocompatibility complex, class II, DQ beta 1
210732_s_at	LGALS8|lectin, galactoside-binding, soluble, 8 (galectin 8)
205668_at	LY75|lymphocyte antigen 75
213645_at	ENOSF1|enolase superfamily member 1
217690_at	TYMS|Thymidylate synthetase
206312_at	GUCY2C|guanylate cyclase 2C (heat stable enterotoxin receptor)
211522_s_at	GNRHR|gonadotropin-releasing hormone receptor
216161_at	SBNO1|Sno, strawberry notch homolog 1 (Drosophila)
205602_x_at	PSG7|pregnancy specific beta-1-glycoprotein 7
208191_x_at	PSG4|pregnancy specific beta-1-glycoprotein 4
208257_x_at	PSG1|pregnancy specific beta-1-glycoprotein 1
209738_x_at	PSG6|pregnancy specific beta-1-glycoprotein 6
215821_x_at	PSG3|pregnancy specific beta-1-glycoprotein 3
208106_x_at	PSG6|pregnancy specific beta-1-glycoprotein 6
209594_x_at	PSG9|pregnancy specific beta-1-glycoprotein 9
213992_at	COL4A6|collagen, type IV, alpha 6
212538_at	DOCK9|dedicator of cytokinesis 9
208884_s_at	EDD1 /// LOC642104|E3 ubiquitin protein ligase, HECT domain containing, 1 /// similar to E3 ubiquitin protein ligase, HECT domain containing, 1
204919_at	PRR4|proline rich 4 (lacrimal)
207443_at	NR2E1|nuclear receptor subfamily 2, group E, member 1
220510_at	RHBG|Rh family, B glycoprotein
210108_at	---|---
207149_at	CDH12|cadherin 12, type 2 (N-cadherin 2)
206213_at	WNT10B|wingless-type MMTV integration site family, member 10B
217571_at	---|---
205032_at	ITGA2|integrin, alpha 2 (CD49B, alpha 2 subunit of VLA-2 receptor)
215092_s_at	NFAT5|nuclear factor of activated T-cells 5, tonicity-responsive
214981_at	POSTN|Periostin, osteoblast specific factor
214850_at	LOC153561|hypothetical protein LOC153561
215389_s_at	TNNT2|troponin T type 2 (cardiac)
207038_at	SLC16A6|solute carrier family 16 (monocarboxylic acid transporters), member 6
218987_at	ATF7IP|activating transcription factor 7 interacting protein
218751_s_at	FBXW7|F-box and WD-40 domain protein 7 (archipelago homolog, Drosophila)
217523_at	CD44|CD44 molecule (Indian blood group)
201901_s_at	YY1|YY1 transcription factor
217575_s_at	SOS2|Son of sevenless homolog 2 (Drosophila)
217576_x_at	SOS2|son of sevenless homolog 2 (Drosophila)
216555_at	RP4-694E4.2|hypothetical protein MGC50372
205385_at	MDM2|Mdm2, transformed 3T3 cell double minute 2, p53 binding protein (mouse)
214245_at	RPS14|ribosomal protein S14
215376_at	---|CDNA FLJ12295 fis, clone MAMMA1001818
206144_at	MAGI1|membrane associated guanylate kinase, WW and PDZ domain containing 1
216198_at	ATF7IP|activating transcription factor 7 interacting protein
203527_s_at	APC|adenomatosis polyposis coli
217508_s_at	C18ORF25|chromosome 18 open reading frame 25
201935_s_at	EIF4G3|eukaryotic translation initiation factor 4 gamma, 3
201936_s_at	EIF4G3|eukaryotic translation initiation factor 4 gamma, 3
209030_s_at	IGSF4|immunoglobulin superfamily, member 4
203350_at	AP1G1|adaptor-related protein complex 1, gamma 1 subunit
212166_at	XPO7|exportin 7
209271_at	FALZ|fetal Alzheimer antigen
213090_s_at	TAF4|TAF4 RNA polymerase II, TATA box binding protein (TBP)-associated factor, 135kDa
201425_at	ALDH2|aldehyde dehydrogenase 2 family (mitochondrial)
212462_at	---|---
204132_s_at	FOXO3A|forkhead box O3A
214624_at	UPK1A|uroplakin 1A
205850_s_at	GABRB3|gamma-aminobutyric acid (GABA) A receptor, beta 3
217532_x_at	MST101|MSTP101
219928_s_at	CABYR|calcium binding tyrosine-(Y)-phosphorylation regulated (fibrousheathin 2)
220472_at	ZCCHC4|zinc finger, CCHC domain containing 4
210219_at	SP100|SP100 nuclear antigen
204013_s_at	LCMT2|leucine carboxyl methyltransferase 2
215343_at	KIAA1509|KIAA1509
220227_at	CDH4|cadherin 4, type 1, R-cadherin (retinal)
207814_at	DEFA6|defensin, alpha 6, Paneth cell-specific
207660_at	DMD|dystrophin (muscular dystrophy, Duchenne and Becker types)
213990_s_at	PAK7|p21(CDKN1A)-activated kinase 7
216196_at	LOC440366|hect domain and RLD 2 pseudogene
219871_at	FLJ13197|hypothetical protein FLJ13197
205949_at	---|---
220961_s_at	TBRG4|transforming growth factor beta regulator 4 /// transforming growth factor beta regulator 4
215694_at	SPATA5L1|spermatogenesis associated 5-like 1
219989_s_at	ANKS1B|ankyrin repeat and sterile alpha motif domain containing 1B
216417_x_at	HOXB9|homeobox B9
220220_at	FLJ10120|hypothetical protein FLJ10120
206239_s_at	SPINK1|serine peptidase inhibitor, Kazal type 1
216115_at	NF1|Neurofibromin 1 (neurofibromatosis, von Recklinghausen disease, Watson disease)
219423_x_at	TNFRSF25|tumor necrosis factor receptor superfamily, member 25
220332_at	CLDN16|claudin 16
206577_at	VIP|vasoactive intestinal peptide
213213_at	DIDO1|death inducer-obliterator 1
218617_at	TRIT1|tRNA isopentenyltransferase 1
202798_at	SEC24B|SEC24 related gene family, member B (S. cerevisiae)
206393_at	TNNI2|troponin I type 2 (skeletal, fast)
213531_s_at	RAB3GAP1|RAB3 GTPase activating protein subunit 1 (catalytic)
210699_at	---|---
205765_at	CYP3A5|cytochrome P450, family 3, subfamily A, polypeptide 5
214234_s_at	CYP3A5|cytochrome P450, family 3, subfamily A, polypeptide 5
211843_x_at	CYP3A7|cytochrome P450, family 3, subfamily A, polypeptide 7
202176_at	ERCC3|excision repair cross-complementing rodent repair deficiency, complementation group 3 (xeroderma pigmentosum group B complementing)
205318_at	KIF5A|kinesin family member 5A
220184_at	NANOG|Nanog homeobox
208161_s_at	ABCC3|ATP-binding cassette, sub-family C (CFTR/MRP), member 3
209641_s_at	ABCC3|ATP-binding cassette, sub-family C (CFTR/MRP), member 3
205485_at	RYR1|ryanodine receptor 1 (skeletal)
211145_x_at	IFNA21|interferon, alpha 21
208935_s_at	LGALS8|lectin, galactoside-binding, soluble, 8 (galectin 8)
218595_s_at	HEATR1|HEAT repeat containing 1
222170_at	LOC440334|Hypothetical LOC440334
212126_at	---|CDNA clone IMAGE:4842353
208159_x_at	DDX11|DEAD/H (Asp-Glu-Ala-Asp/His) box polypeptide 11 (CHL1-like helicase homolog, S. cerevisiae)
216874_at	DKFZP686O1327|Hypothetical gene supported by BC043549; BX648102 /// Homo sapiens, clone IMAGE:5538654, mRNA
220518_at	ABI3BP|ABI gene family, member 3 (NESH) binding protein
211437_at	MAP3K4|Mitogen-activated protein kinase kinase kinase 4
220180_at	CCDC68|coiled-coil domain containing 68
222364_at	---|---
221152_at	---|---
221728_x_at	XIST|X (inactive)-specific transcript
214218_s_at	XIST|X (inactive)-specific transcript
213876_x_at	ZRSR2|zinc finger (CCCH type), RNA-binding motif and serine/arginine rich 2
208174_x_at	ZRSR2|zinc finger (CCCH type), RNA-binding motif and serine/arginine rich 2
203992_s_at	UTX|ubiquitously transcribed tetratricopeptide repeat, X chromosome
203990_s_at	UTX|ubiquitously transcribed tetratricopeptide repeat, X chromosome
212514_x_at	DDX3X|DEAD (Asp-Glu-Ala-Asp) box polypeptide 3, X-linked
220520_s_at	RP13-383K5.2|hypothetical protein FLJ20130
205321_at	EIF2S3|eukaryotic translation initiation factor 2, subunit 3 gamma, 52kDa
220644_at	LOC653311|similar to lamin B receptor
218110_at	XAB2|XPA binding protein 2
214100_x_at	NSUN5B|NOL1/NOP2/Sun domain family, member 5B
213460_x_at	NSUN5C|NOL1/NOP2/Sun domain family, member 5C
205590_at	RASGRP1|RAS guanyl releasing protein 1 (calcium and DAG-regulated)
204363_at	F3|coagulation factor III (thromboplastin, tissue factor)
209403_at	TBC1D3 /// TBC1D3C /// TBC1D3D /// LOC653380 /// LOC653498 /// TBC1D3H /// TBC1D3F /// TBC1D3E|TBC1 domain family, member 3 /// TBC1 domain family, member 3C /// TBC1 domain family, member 3D /// similar to TBC1 domain family, member 3B /// similar to TBC1 domain family, member 3B /// TBC1 domain family, member 3H /// TBC1 domain family, member 3F /// TBC1 domain family, member 3E
222196_at	LOC286434|hypothetical protein LOC286434
59433_at	LOC286434|hypothetical protein LOC286434
217712_at	---|---
207803_s_at	CSN3|casein kappa
208733_at	RAB2|RAB2, member RAS oncogene family
220483_s_at	RNF19|ring finger protein 19
206686_at	PDK1|pyruvate dehydrogenase kinase, isozyme 1
214980_at	UBE3A|Ubiquitin protein ligase E3A (human papilloma virus E6-associated protein, Angelman syndrome)
215848_at	ZNF291|zinc finger protein 291
207543_s_at	P4HA1|procollagen-proline, 2-oxoglutarate 4-dioxygenase (proline 4-hydroxylase), alpha polypeptide I
206417_at	CNGA1|cyclic nucleotide gated channel alpha 1
208542_x_at	ZNF208|zinc finger protein 208
211356_x_at	LEPR|leptin receptor
211355_x_at	LEPR|leptin receptor
209894_at	LEPR|leptin receptor
211354_s_at	LEPR|leptin receptor
213218_at	ZNF187|zinc finger protein 187
214843_s_at	USP33|ubiquitin specific peptidase 33
201925_s_at	CD55|CD55 molecule, decay accelerating factor for complement (Cromer blood group)
201926_s_at	CD55|CD55 molecule, decay accelerating factor for complement (Cromer blood group)
207394_at	ZNF137|zinc finger protein 137 (clone pHZ-30)
206142_at	ZNF135|zinc finger protein 135
212930_at	ATP2B1|ATPase, Ca++ transporting, plasma membrane 1
205453_at	HOXB2|homeobox B2
209242_at	PEG3|paternally expressed 3
207120_at	ZNF667|zinc finger protein 667
204191_at	IFNAR1|interferon (alpha, beta and omega) receptor 1
206552_s_at	TAC1|tachykinin, precursor 1 (substance K, substance P, neurokinin 1, neurokinin 2, neuromedin L, neurokinin alpha, neuropeptide K, neuropeptide gamma)
205476_at	CCL20|chemokine (C-C motif) ligand 20
210118_s_at	IL1A|interleukin 1, alpha
219171_s_at	ZNF236|zinc finger protein 236
221586_s_at	E2F5|E2F transcription factor 5, p130-binding
213479_at	NPTX2|neuronal pentraxin II
39966_at	CSPG5|chondroitin sulfate proteoglycan 5 (neuroglycan C)
214651_s_at	HOXA9|homeobox A9
209905_at	HOXA9|homeobox A9
56919_at	WDR48|WD repeat domain 48
205511_at	FLJ10038|hypothetical protein FLJ10038
210849_s_at	VPS41|vacuolar protein sorting 41 (yeast)
222027_at	NUCKS1|Nuclear casein kinase and cyclin-dependent kinase substrate 1
204849_at	TCFL5|transcription factor-like 5 (basic helix-loop-helix)
205745_x_at	ADAM17|ADAM metallopeptidase domain 17 (tumor necrosis factor, alpha, converting enzyme)
206643_at	HAL|histidine ammonia-lyase
217521_at	---|Transcribed locus
213467_at	RND2|Rho family GTPase 2
201291_s_at	TOP2A|topoisomerase (DNA) II alpha 170kDa
201292_at	TOP2A|topoisomerase (DNA) II alpha 170kDa
203755_at	BUB1B|BUB1 budding uninhibited by benzimidazoles 1 homolog beta (yeast)
205015_s_at	TGFA|transforming growth factor, alpha
214640_at	UNC93A|unc-93 homolog A (C. elegans)
209378_s_at	KIAA1128|KIAA1128
205809_s_at	WASL|Wiskott-Aldrich syndrome-like
205016_at	TGFA|transforming growth factor, alpha
203079_s_at	CUL2|cullin 2
205174_s_at	QPCT|glutaminyl-peptide cyclotransferase (glutaminyl cyclase)
218125_s_at	CCDC25|coiled-coil domain containing 25
205355_at	ACADSB|acyl-Coenzyme A dehydrogenase, short/branched chain
219990_at	E2F8|E2F transcription factor 8
205728_at	---|CDNA clone IMAGE:4811759
215321_at	RPIB9|Rap2-binding protein 9
220994_s_at	STXBP6|syntaxin binding protein 6 (amisyn)
210861_s_at	WISP3|WNT1 inducible signaling pathway protein 3
213523_at	CCNE1|cyclin E1
220030_at	STYK1|serine/threonine/tyrosine kinase 1
214042_s_at	RPL22|ribosomal protein L22
203767_s_at	STS|steroid sulfatase (microsomal), arylsulfatase C, isozyme S
203768_s_at	STS|steroid sulfatase (microsomal), arylsulfatase C, isozyme S
213424_at	KIAA0895|KIAA0895 protein
219106_s_at	KBTBD10|kelch repeat and BTB (POZ) domain containing 10
221523_s_at	RRAGD|Ras-related GTP binding D
218658_s_at	ACTR8|ARP8 actin-related protein 8 homolog (yeast)
218980_at	FHOD3|formin homology 2 domain containing 3
208853_s_at	CANX|calnexin
213496_at	LPPR4|plasticity related gene 1
203115_at	FECH|ferrochelatase (protoporphyria)
209267_s_at	SLC39A8|solute carrier family 39 (zinc transporter), member 8
209286_at	CDC42EP3|CDC42 effector protein (Rho GTPase binding) 3
33494_at	ETFDH|electron-transferring-flavoprotein dehydrogenase
210638_s_at	FBXO9|F-box protein 9
218519_at	SLC35A5|solute carrier family 35, member A5
202125_s_at	TRAK2|trafficking protein, kinesin binding 2
201518_at	CBX1|chromobox homolog 1 (HP1 beta homolog Drosophila )
209296_at	PPM1B|protein phosphatase 1B (formerly 2C), magnesium-dependent, beta isoform
200880_at	DNAJA1|DnaJ (Hsp40) homolog, subfamily A, member 1
220831_at	GCNT4|glucosaminyl (N-acetyl) transferase 4, core 2 (beta-1,6-N-acetylglucosaminyltransferase)
220103_s_at	MRPS18C|mitochondrial ribosomal protein S18C
203852_s_at	SMN1 /// SMN2|survival of motor neuron 1, telomeric /// survival of motor neuron 2, centromeric
221735_at	WDR48|WD repeat domain 48
218236_s_at	PRKD3|protein kinase D3
212450_at	KIAA0256|KIAA0256 gene product
212526_at	SPG20|spastic paraplegia 20, spartin (Troyer syndrome)
205052_at	AUH|AU RNA binding protein/enoyl-Coenzyme A hydratase
220156_at	EFCAB1|EF-hand calcium binding domain 1
219306_at	KIF15|kinesin family member 15
219296_at	ZDHHC13|zinc finger, DHHC-type containing 13
219234_x_at	SCRN3|secernin 3
219627_at	ZNF767|zinc finger family member 767
210179_at	KCNJ13|potassium inwardly-rectifying channel, subfamily J, member 13
211427_s_at	KCNJ13|potassium inwardly-rectifying channel, subfamily J, member 13
220876_at	---|PRO1257
209535_s_at	---|---
208925_at	CLDND1|claudin domain containing 1
213188_s_at	MINA|MYC induced nuclear antigen
214030_at	DKFZP667G2110|hypothetical protein DKFZp667G2110
218166_s_at	RSF1|remodeling and spacing factor 1
220613_s_at	SYTL2|synaptotagmin-like 2
206900_x_at	ZNF253|zinc finger protein 253
211665_s_at	SOS2|son of sevenless homolog 2 (Drosophila) /// son of sevenless homolog 2 (Drosophila)
202946_s_at	BTBD3|BTB (POZ) domain containing 3
205187_at	SMAD5|SMAD, mothers against DPP homolog 5 (Drosophila)
212760_at	UBR2|ubiquitin protein ligase E3 component n-recognin 2
212899_at	CDC2L6|cell division cycle 2-like 6 (CDK8-like)
221868_at	KIAA1155|KIAA1155 protein
219115_s_at	IL20RA|interleukin 20 receptor, alpha
205773_at	CPEB3|cytoplasmic polyadenylation element binding protein 3
64883_at	MOSPD2|motile sperm domain containing 2
221895_at	MOSPD2|motile sperm domain containing 2
210266_s_at	TRIM33|tripartite motif-containing 33
207870_at	AKAP9|A kinase (PRKA) anchor protein (yotiao) 9
214388_at	PFAAP5|Phosphonoformate immuno-associated protein 5
213046_at	PABPN1|poly(A) binding protein, nuclear 1
214235_at	CYP3A5|cytochrome P450, family 3, subfamily A, polypeptide 5
214124_x_at	---|---
210389_x_at	TUBD1|tubulin, delta 1
218098_at	---|---
213624_at	SMPDL3A|sphingomyelin phosphodiesterase, acid-like 3A
207279_s_at	NEBL|nebulette
203178_at	GATM|glycine amidinotransferase (L-arginine:glycine amidinotransferase)
216733_s_at	GATM|glycine amidinotransferase (L-arginine:glycine amidinotransferase)
211038_s_at	CROCC /// MGC12760 /// LOC645719|ciliary rootlet coiled-coil, rootletin /// ciliary rootlet coiled-coil, rootletin /// hypothetical protein MGC12760 /// hypothetical protein MGC12760 /// similar to ciliary rootlet coiled-coil, rootletin /// similar to ciliary rootlet coiled-coil, rootletin
207904_s_at	LNPEP|leucyl/cystinyl aminopeptidase
212418_at	ELF1|E74-like factor 1 (ets domain transcription factor)
201335_s_at	ARHGEF12|Rho guanine nucleotide exchange factor (GEF) 12
216503_s_at	MLLT10|myeloid/lymphoid or mixed-lineage leukemia (trithorax homolog, Drosophila); translocated to, 10
214045_at	LIAS|lipoic acid synthetase
219376_at	ZNF322B|zinc finger protein 322B
209804_at	DCLRE1A|DNA cross-link repair 1A (PSO2 homolog, S. cerevisiae)
213747_at	---|---
208199_s_at	ZFP161|zinc finger protein 161 homolog (mouse)
206147_x_at	SCML2|sex comb on midleg-like 2 (Drosophila)
207108_s_at	NIPBL|Nipped-B homolog (Drosophila)
201768_s_at	CLINT1|clathrin interactor 1
207223_s_at	ROD1|ROD1 regulator of differentiation 1 (S. pombe)
214182_at	ARF6|ADP-ribosylation factor 6
213929_at	---|Homo sapiens, Similar to likely ortholog of yeast ARV1, clone IMAGE:4733238, mRNA
204614_at	SERPINB2|serpin peptidase inhibitor, clade B (ovalbumin), member 2
216060_s_at	DAAM1|dishevelled associated activator of morphogenesis 1
203553_s_at	MAP4K5|mitogen-activated protein kinase kinase kinase kinase 5
204201_s_at	PTPN13|protein tyrosine phosphatase, non-receptor type 13 (APO-1/CD95 (Fas)-associated phosphatase)
209576_at	GNAI1|guanine nucleotide binding protein (G protein), alpha inhibiting activity polypeptide 1
203552_at	MAP4K5|mitogen-activated protein kinase kinase kinase kinase 5
211081_s_at	MAP4K5|mitogen-activated protein kinase kinase kinase kinase 5 /// mitogen-activated protein kinase kinase kinase kinase 5
219998_at	HSPC159|HSPC159 protein
209925_at	OCLN /// LOC647859 /// LOC653400|occludin /// similar to Occludin /// similar to Occludin
214827_at	PARD6B|par-6 partitioning defective 6 homolog beta (C. elegans)
211907_s_at	PARD6B|par-6 partitioning defective 6 homolog beta (C. elegans) /// par-6 partitioning defective 6 homolog beta (C. elegans)
218705_s_at	SNX24|sorting nexing 24
218041_x_at	SLC38A2|solute carrier family 38, member 2
220924_s_at	SLC38A2|solute carrier family 38, member 2
209318_x_at	PLAGL1|pleiomorphic adenoma gene-like 1
207002_s_at	PLAGL1|pleiomorphic adenoma gene-like 1
214474_at	PRKAB2|protein kinase, AMP-activated, beta 2 non-catalytic subunit
210018_x_at	MALT1|mucosa associated lymphoid tissue lymphoma translocation gene 1
220608_s_at	---|---
221765_at	---|---
204881_s_at	UGCG|UDP-glucose ceramide glucosyltransferase
209046_s_at	GABARAPL2|GABA(A) receptor-associated protein-like 2
219104_at	RNF141|ring finger protein 141
204971_at	CSTA|cystatin A (stefin A)
202272_s_at	FBXO28|F-box protein 28
200863_s_at	RAB11A|RAB11A, member RAS oncogene family
218666_s_at	STX17|syntaxin 17
205767_at	EREG|epiregulin
206177_s_at	ARG1|arginase, liver
203560_at	GGH|gamma-glutamyl hydrolase (conjugase, folylpolygammaglutamyl hydrolase)
205969_at	AADAC|arylacetamide deacetylase (esterase)
202484_s_at	MBD2|methyl-CpG binding domain protein 2
218373_at	FTS|fused toes homolog (mouse)
218706_s_at	GRAMD3|GRAM domain containing 3
208709_s_at	NRD1|nardilysin (N-arginine dibasic convertase)
210117_at	SPAG1|sperm associated antigen 1
205027_s_at	MAP3K8|mitogen-activated protein kinase kinase kinase 8
202364_at	MXI1|MAX interactor 1 /// MAX interactor 1
210480_s_at	MYO6|myosin VI
220200_s_at	SETD8|SET domain containing (lysine methyltransferase) 8
217208_s_at	DLG1|discs, large homolog 1 (Drosophila)
210015_s_at	MAP2|microtubule-associated protein 2
214807_at	---|MRNA; cDNA DKFZp564O0862 (from clone DKFZp564O0862)
201146_at	NFE2L2|nuclear factor (erythroid-derived 2)-like 2
207143_at	CDK6|cyclin-dependent kinase 6
203855_at	WDR47|WD repeat domain 47
204243_at	RLF|rearranged L-myc fusion
211702_s_at	USP32|ubiquitin specific peptidase 32 /// ubiquitin specific peptidase 32
210335_at	PAMCI|peptidylglycine alpha-amidating monooxygenase COOH-terminal interactor
215342_s_at	RABGAP1L|RAB GTPase activating protein 1-like
203020_at	RABGAP1L|RAB GTPase activating protein 1-like
213165_at	---|Clone CDABP0086 mRNA sequence
203019_x_at	SSX2IP|synovial sarcoma, X breakpoint 2 interacting protein
205345_at	BARD1|BRCA1 associated RING domain 1
214693_x_at	NBPF14 /// NBPF1 /// KIAA1245 /// NBPF11 /// NBPF15 /// NBPF20 /// NBPF9 /// NBPF10 /// NBPF12 /// NBPF8 /// NBPF16 /// LOC644474 /// LOC652874|neuroblastoma breakpoint family, member 14 /// neuroblastoma breakpoint family, member 1 /// KIAA1245 /// neuroblastoma breakpoint family, member 11 /// neuroblastoma breakpoint family, member 15 /// neuroblastoma breakpoint family, member 20 /// neurobla…
201732_s_at	CLCN3|chloride channel 3
214445_at	ELL2|elongation factor, RNA polymerase II, 2
214446_at	ELL2|elongation factor, RNA polymerase II, 2
201734_at	CLCN3|Chloride channel 3
201733_at	CLCN3|chloride channel 3
201769_at	CLINT1|clathrin interactor 1
205520_at	STRN|striatin, calmodulin binding protein
200681_at	GLO1|glyoxalase I
219048_at	PIGN|phosphatidylinositol glycan, class N
218237_s_at	SLC38A1|solute carrier family 38, member 1
207483_s_at	CAND1|cullin-associated and neddylation-dissociated 1
212623_at	TMEM41B|transmembrane protein 41B
218433_at	PANK3|pantothenate kinase 3
212897_at	CDC2L6|cell division cycle 2-like 6 (CDK8-like)
218643_s_at	CRIPT|postsynaptic protein CRIPT
207563_s_at	OGT|O-linked N-acetylglucosamine (GlcNAc) transferase (UDP-N-acetylglucosamine:polypeptide-N-acetylglucosaminyl transferase)
208653_s_at	CD164|CD164 molecule, sialomucin
204822_at	TTK|TTK protein kinase
209907_s_at	ITSN2|intersectin 2
218782_s_at	ATAD2|ATPase family, AAA domain containing 2
206860_s_at	FLJ20323|hypothetical protein FLJ20323
211724_x_at	FLJ20323|hypothetical protein FLJ20323 /// hypothetical protein FLJ20323
219688_at	BBS7|Bardet-Biedl syndrome 7
219793_at	SNX16|sorting nexin 16
220549_at	RAD54B|RAD54 homolog B (S. cerevisiae)
221774_x_at	FAM48A|family with sequence similarity 48, member A
220408_x_at	FAM48A|family with sequence similarity 48, member A
212637_s_at	WWP1|WW domain containing E3 ubiquitin protein ligase 1
220350_at	ZNF235|zinc finger protein 235
212638_s_at	WWP1|WW domain containing E3 ubiquitin protein ligase 1
204172_at	CPOX|coproporphyrinogen oxidase
206572_x_at	ZNF85|zinc finger protein 85
212184_s_at	MAP3K7IP2|mitogen-activated protein kinase kinase kinase 7 interacting protein 2
206862_at	ZNF254 /// ZNF539|zinc finger protein 254 /// zinc finger protein 539
218539_at	FBXO34|F-box protein 34
218048_at	COMMD3|COMM domain containing 3
209376_x_at	SFRS2IP|splicing factor, arginine/serine-rich 2, interacting protein
221645_s_at	ZNF83|zinc finger protein 83
219317_at	POLI|polymerase (DNA directed) iota
202073_at	OPTN|optineurin
207236_at	ZNF345|zinc finger protein 345
204918_s_at	MLLT3|myeloid/lymphoid or mixed-lineage leukemia (trithorax homolog, Drosophila); translocated to, 3
205514_at	ZNF415|zinc finger protein 415
219974_x_at	ECHDC1|enoyl Coenzyme A hydratase domain containing 1
208073_x_at	TTC3|tetratricopeptide repeat domain 3
210645_s_at	TTC3|tetratricopeptide repeat domain 3
203011_at	IMPA1|inositol(myo)-1(or 4)-monophosphatase 1
213189_at	MINA|MYC induced nuclear antigen
202322_s_at	GGPS1|geranylgeranyl diphosphate synthase 1
202502_at	ACADM|acyl-Coenzyme A dehydrogenase, C-4 to C-12 straight chain
201121_s_at	PGRMC1|progesterone receptor membrane component 1
202195_s_at	TMED5|transmembrane emp24 protein transport domain containing 5
215207_x_at	YDD19 /// C6ORF68 /// LOC389850 /// LOC654174|YDD19 protein /// chromosome 6 open reading frame 68 /// similar to CG4775-PA /// similar to CG4775-PA
37079_at	YDD19|YDD19 protein
208499_s_at	DNAJC3|DnaJ (Hsp40) homolog, subfamily C, member 3
212222_at	PSME4|proteasome (prosome, macropain) activator subunit 4
219002_at	FASTKD1|FAST kinase domains 1
215286_s_at	PHTF2|putative homeodomain transcription factor 2
207808_s_at	PROS1|protein S (alpha)
201761_at	MTHFD2|methylenetetrahydrofolate dehydrogenase (NADP+ dependent) 2, methenyltetrahydrofolate cyclohydrolase
218196_at	OSTM1|osteopetrosis associated transmembrane protein 1
212397_at	RDX|radixin
212398_at	RDX|radixin
218694_at	ARMCX1|armadillo repeat containing, X-linked 1
205573_s_at	SNX7|sorting nexin 7
206302_s_at	NUDT4 /// NUDT4P1|nudix (nucleoside diphosphate linked moiety X)-type motif 4 /// nudix (nucleoside diphosphate linked moiety X)-type motif 4 pseudogene 1
216899_s_at	SKAP2|src kinase associated phosphoprotein 2
204361_s_at	SKAP2|src kinase associated phosphoprotein 2
217953_at	---|---
210985_s_at	SP100|SP100 nuclear antigen
212853_at	DCUN1D4|DCN1, defective in cullin neddylation 1, domain containing 4 (S. cerevisiae)
217494_s_at	PTENP1|phosphatase and tensin homolog (mutated in multiple advanced cancers 1), pseudogene 1
211711_s_at	PTEN|phosphatase and tensin homolog (mutated in multiple advanced cancers 1) /// phosphatase and tensin homolog (mutated in multiple advanced cancers 1)
204053_x_at	PTEN|phosphatase and tensin homolog (mutated in multiple advanced cancers 1)
217492_s_at	PTEN|phosphatase and tensin homolog (mutated in multiple advanced cancers 1)
208664_s_at	TTC3|tetratricopeptide repeat domain 3
214631_at	ZBTB33|zinc finger and BTB domain containing 33
219970_at	GIPC2|GIPC PDZ domain containing family, member 2
205416_s_at	ATXN3|ataxin 3
212388_at	USP24|ubiquitin specific peptidase 24
213882_at	TM2D1|TM2 domain containing 1
209585_s_at	MINPP1|multiple inositol polyphosphate histidine phosphatase, 1
204823_at	NAV3|neuron navigator 3
210834_s_at	PTGER3|prostaglandin E receptor 3 (subtype EP3)
213933_at	PTGER3|prostaglandin E receptor 3 (subtype EP3)
216884_at	PTPN12|protein tyrosine phosphatase, non-receptor type 12
201181_at	GNAI3|guanine nucleotide binding protein (G protein), alpha inhibiting activity polypeptide 3
205928_at	ZNF443|zinc finger protein 443
207724_s_at	SPAST|spastin
205140_at	FPGT|fucose-1-phosphate guanylyltransferase
213101_s_at	ACTR3|ARP3 actin-related protein 3 homolog (yeast)
213102_at	ACTR3|ARP3 actin-related protein 3 homolog (yeast)
200996_at	ACTR3|ARP3 actin-related protein 3 homolog (yeast)
205078_at	PIGF|phosphatidylinositol glycan, class F
200944_s_at	HMGN1|high-mobility group nucleosome binding domain 1
217819_at	GOLGA7|golgi autoantigen, golgin subfamily a, 7
208839_s_at	CAND1|cullin-associated and neddylation-dissociated 1
214895_s_at	ADAM10|ADAM metallopeptidase domain 10
219467_at	FLJ20125|hypothetical protein FLJ20125
218819_at	INTS6|integrator complex subunit 6
202146_at	IFRD1|interferon-related developmental regulator 1
218458_at	GMCL1|germ cell-less homolog 1 (Drosophila)
206536_s_at	BIRC4|baculoviral IAP repeat-containing 4
220250_at	ZNF286|zinc finger protein 286
212435_at	TRIM33|tripartite motif-containing 33
203583_at	UNC50|unc-50 homolog (C. elegans)
218536_at	MRS2L|MRS2-like, magnesium homeostasis factor (S. cerevisiae)
202749_at	WRB|tryptophan rich basic protein
201754_at	COX6C|cytochrome c oxidase subunit VIc
204312_x_at	CREB1|cAMP responsive element binding protein 1
216574_s_at	RPE /// LOC440001 /// LOC649755|ribulose-5-phosphate-3-epimerase /// rcRPE /// similar to Ribulose-phosphate 3-epimerase (Ribulose-5-phosphate-3-epimerase) (HUSSY-17)
213682_at	NUP50|nucleoporin 50kDa
218295_s_at	NUP50|nucleoporin 50kDa
218294_s_at	NUP50|nucleoporin 50kDa
209362_at	SURB7|SRB7 suppressor of RNA polymerase B homolog (yeast)
218566_s_at	CHORDC1|cysteine and histidine-rich domain (CHORD)-containing 1
202956_at	ARFGEF1|ADP-ribosylation factor guanine nucleotide-exchange factor 1(brefeldin A-inhibited)
212367_at	FEM1B|fem-1 homolog b (C. elegans)
201986_at	THRAP1|thyroid hormone receptor associated protein 1
213469_at	PGAP1|GPI deacylase
212920_at	---|---
217887_s_at	EPS15|epidermal growth factor receptor pathway substrate 15
210540_s_at	B4GALT4|UDP-Gal:betaGlcNAc beta 1,4- galactosyltransferase, polypeptide 4
212876_at	B4GALT4|UDP-Gal:betaGlcNAc beta 1,4- galactosyltransferase, polypeptide 4
207956_x_at	APRIN|androgen-induced proliferation inhibitor
212455_at	YTHDC1|YTH domain containing 1
203519_s_at	UPF2|UPF2 regulator of nonsense transcripts homolog (yeast)
222237_s_at	ZNF228|zinc finger protein 228
200050_at	ZNF146|zinc finger protein 146 /// zinc finger protein 146
206693_at	IL7|interleukin 7
205842_s_at	JAK2|Janus kinase 2 (a protein tyrosine kinase)
205841_at	JAK2|Janus kinase 2 (a protein tyrosine kinase)
221518_s_at	USP47|ubiquitin specific peptidase 47
214937_x_at	PCM1|pericentriolar material 1
219570_at	C20ORF23|chromosome 20 open reading frame 23
205995_x_at	IQCB1|IQ motif containing B1
211938_at	EIF4B|eukaryotic translation initiation factor 4B
206005_s_at	KIAA1009|KIAA1009
214720_x_at	41892|septin 10
211801_x_at	MFN1|mitofusin 1
214483_s_at	ARFIP1|ADP-ribosylation factor interacting protein 1 (arfaptin 1)
211988_at	SMARCE1|SWI/SNF related, matrix associated, actin dependent regulator of chromatin, subfamily e, member 1
213971_s_at	SUZ12 /// SUZ12P|suppressor of zeste 12 homolog (Drosophila) /// suppressor of zeste 12 homolog pseudogene
213387_at	KIAA1240|KIAA1240 protein
213653_at	METTL3|methyltransferase like 3
221569_at	AHI1|Abelson helper integration site 1
203518_at	LYST|lysosomal trafficking regulator
203494_s_at	CEP57|centrosomal protein 57kDa
219372_at	IFT81|intraflagellar transport 81 homolog (Chlamydomonas)
219036_at	CEP70|centrosomal protein 70kDa
214277_at	COX11 /// COX11P|COX11 homolog, cytochrome c oxidase assembly protein (yeast) /// COX11 homolog, cytochrome c oxidase assembly protein (yeast) pseudogene
218674_at	FLJ13611|hypothetical protein FLJ13611
203566_s_at	AGL|amylo-1, 6-glucosidase, 4-alpha-glucanotransferase (glycogen debranching enzyme, glycogen storage disease type III)
201602_s_at	PPP1R12A|protein phosphatase 1, regulatory (inhibitor) subunit 12A
201603_at	PPP1R12A|protein phosphatase 1, regulatory (inhibitor) subunit 12A
204662_at	CP110|CP110 protein
212366_at	ZNF292|zinc finger protein 292
208047_s_at	NAB1|NGFI-A binding protein 1 (EGR1 binding protein 1)
211139_s_at	NAB1|NGFI-A binding protein 1 (EGR1 binding protein 1)
209272_at	NAB1|NGFI-A binding protein 1 (EGR1 binding protein 1)
202301_s_at	FLJ11021|similar to splicing factor, arginine/serine-rich 4
203457_at	STX7|syntaxin 7
37802_r_at	FAM63B|family with sequence similarity 63, member B
205739_x_at	ZNF588|zinc finger protein 588
201723_s_at	GALNT1|UDP-N-acetyl-alpha-D-galactosamine:polypeptide N-acetylgalactosaminyltransferase 1 (GalNAc-T1)
201724_s_at	GALNT1|UDP-N-acetyl-alpha-D-galactosamine:polypeptide N-acetylgalactosaminyltransferase 1 (GalNAc-T1)
201722_s_at	GALNT1|UDP-N-acetyl-alpha-D-galactosamine:polypeptide N-acetylgalactosaminyltransferase 1 (GalNAc-T1)
219109_at	SPAG16|sperm associated antigen 16
209566_at	INSIG2|insulin induced gene 2
219313_at	GRAMD1C|GRAM domain containing 1C
205415_s_at	ATXN3|ataxin 3
218645_at	ZNF277|zinc finger protein 277
202258_s_at	PFAAP5|phosphonoformate immuno-associated protein 5
220735_s_at	SENP7|SUMO1/sentrin specific peptidase 7
214691_x_at	FAM63B|family with sequence similarity 63, member B
220432_s_at	CYP39A1|cytochrome P450, family 39, subfamily A, polypeptide 1
202960_s_at	MUT|methylmalonyl Coenzyme A mutase
222111_at	---|CDNA clone IMAGE:4794011
203166_at	CFDP1|craniofacial development protein 1
200912_s_at	EIF4A2|eukaryotic translation initiation factor 4A, isoform 2
217547_x_at	ZNF675|zinc finger protein 675
215758_x_at	ZNF93|zinc finger protein 93
212374_at	FEM1B|fem-1 homolog b (C. elegans)
218263_s_at	LOC58486|transposon-derived Buster1 transposase-like protein gene
210943_s_at	LYST|lysosomal trafficking regulator
219280_at	BRWD1|bromodomain and WD repeat domain containing 1
220985_s_at	RNF170|ring finger protein 170 /// ring finger protein 170
201831_s_at	VDP|vesicle docking protein p115
221770_at	RPE|ribulose-5-phosphate-3-epimerase
214139_at	---|---
216221_s_at	PUM2|pumilio homolog 2 (Drosophila)
212066_s_at	USP34|ubiquitin specific peptidase 34
210818_s_at	BACH1|BTB and CNC homology 1, basic leucine zipper transcription factor 1
218319_at	PELI1|pellino homolog 1 (Drosophila)
203593_at	CD2AP|CD2-associated protein
212286_at	ANKRD12|ankyrin repeat domain 12
219844_at	C10ORF118|chromosome 10 open reading frame 118
201567_s_at	GOLGA4|golgi autoantigen, golgin subfamily a, 4
209258_s_at	SMC3|structural maintenance of chromosomes 3
209259_s_at	SMC3|structural maintenance of chromosomes 3
216550_x_at	ANKRD12|ankyrin repeat domain 12
216563_at	ANKRD12|Ankyrin repeat domain 12
212634_at	KIAA0776|KIAA0776
209257_s_at	SMC3|structural maintenance of chromosomes 3
220369_at	KIAA2010|KIAA2010
217939_s_at	AFTIPHILIN|aftiphilin protein
213305_s_at	PPP2R5C|protein phosphatase 2, regulatory subunit B (B56), gamma isoform
209595_at	GTF2F2|general transcription factor IIF, polypeptide 2, 30kDa
201179_s_at	GNAI3|guanine nucleotide binding protein (G protein), alpha inhibiting activity polypeptide 3
210932_s_at	RNF6|ring finger protein (C3H2C3 type) 6
217465_at	NCKAP1|NCK-associated protein 1
220368_s_at	KIAA2010|KIAA2010
213618_at	CENTD1|centaurin, delta 1
201371_s_at	CUL3|cullin 3
218171_at	VPS4B|vacuolar protein sorting 4 homolog B (S. cerevisiae)
212603_at	MRPS31|mitochondrial ribosomal protein S31
203216_s_at	MYO6|myosin VI
220933_s_at	ZCCHC6|zinc finger, CCHC domain containing 6
213288_at	---|Clone 23620 mRNA sequence
219532_at	ELOVL4|elongation of very long chain fatty acids (FEN1/Elo2, SUR4/Elo3, yeast)-like 4
211548_s_at	HPGD|hydroxyprostaglandin dehydrogenase 15-(NAD)
203913_s_at	HPGD|hydroxyprostaglandin dehydrogenase 15-(NAD)
203914_x_at	HPGD|hydroxyprostaglandin dehydrogenase 15-(NAD)
211549_s_at	HPGD|hydroxyprostaglandin dehydrogenase 15-(NAD)
201534_s_at	UBL3|ubiquitin-like 3
201535_at	UBL3|ubiquitin-like 3
209379_s_at	KIAA1128|KIAA1128
210681_s_at	USP15|ubiquitin specific peptidase 15
212907_at	SLC30A1|Solute carrier family 30 (zinc transporter), member 1
218603_at	HECA|headcase homolog (Drosophila)
207017_at	RAB27B|RAB27B, member RAS oncogene family
207018_s_at	RAB27B|RAB27B, member RAS oncogene family
202516_s_at	DLG1|discs, large homolog 1 (Drosophila)
218150_at	ARL5A|ADP-ribosylation factor-like 5A
200914_x_at	KTN1|kinectin 1 (kinesin receptor)
222201_s_at	CASP8AP2|CASP8 associated protein 2
212794_s_at	KIAA1033|KIAA1033
215936_s_at	KIAA1033|KIAA1033
219321_at	MPP5|membrane protein, palmitoylated 5 (MAGUK p55 subfamily member 5)
210361_s_at	ELF2|E74-like factor 2 (ets domain transcription factor)
205308_at	C8ORF70|chromosome 8 open reading frame 70
217802_s_at	NUCKS1|nuclear casein kinase and cyclin-dependent kinase substrate 1
206989_s_at	SFRS2IP|splicing factor, arginine/serine-rich 2, interacting protein
212989_at	TMEM23|transmembrane protein 23
214820_at	BRWD1|bromodomain and WD repeat domain containing 1
215415_s_at	LYST|lysosomal trafficking regulator
202763_at	CASP3|caspase 3, apoptosis-related cysteine peptidase
214683_s_at	CLK1|CDC-like kinase 1
205443_at	SNAPC1|small nuclear RNA activating complex, polypeptide 1, 43kDa
209430_at	BTAF1|BTAF1 RNA polymerase II, B-TFIID transcription factor-associated, 170kDa (Mot1 homolog, S. cerevisiae)
217828_at	SLTM|SAFB-like, transcription modulator
209180_at	RABGGTB|Rab geranylgeranyltransferase, beta subunit
204064_at	THOC1|THO complex 1
213000_at	MORC3|MORC family CW-type zinc finger 3
201071_x_at	SF3B1|splicing factor 3b, subunit 1, 155kDa
211185_s_at	SF3B1|splicing factor 3b, subunit 1, 155kDa
203987_at	FZD6|frizzled homolog 6 (Drosophila)
210148_at	---|---
209654_at	KIAA0947|KIAA0947 protein
209056_s_at	CDC5L|CDC5 cell division cycle 5-like (S. pombe)
217986_s_at	BAZ1A|bromodomain adjacent to zinc finger domain, 1A
218423_x_at	VPS54|vacuolar protein sorting 54 (S. cerevisiae)
218515_at	C21ORF66|Chromosome 21 open reading frame 66
202372_at	---|Full-length cDNA clone CS0DC007YG11 of Neuroblastoma Cot 25-normalized of Homo sapiens (human)
221842_s_at	ZNF131|zinc finger protein 131 (clone pHZ-10)
208838_at	---|---
211114_x_at	SIP1|survival of motor neuron protein interacting protein 1
205361_s_at	PFDN4|prefoldin subunit 4
211115_x_at	SIP1|survival of motor neuron protein interacting protein 1
220553_s_at	PRPF39|PRP39 pre-mRNA processing factor 39 homolog (S. cerevisiae)
204571_x_at	PIN4|protein (peptidylprolyl cis/trans isomerase) NIMA-interacting, 4 (parvulin)
203970_s_at	PEX3|peroxisomal biogenesis factor 3
209095_at	DLD|dihydrolipoamide dehydrogenase
205084_at	BCAP29|B-cell receptor-associated protein 29
204615_x_at	IDI1|isopentenyl-diphosphate delta isomerase 1
208881_x_at	IDI1|isopentenyl-diphosphate delta isomerase 1
201832_s_at	VDP|vesicle docking protein p115
203845_at	PCAF|p300/CBP-associated factor
218721_s_at	C1ORF27|chromosome 1 open reading frame 27
211760_s_at	VAMP4|vesicle-associated membrane protein 4 /// vesicle-associated membrane protein 4
204732_s_at	TRIM23|tripartite motif-containing 23
203910_at	ARHGAP29|Rho GTPase activating protein 29
213065_at	CCDC131|coiled-coil domain containing 131
219754_at	RP13-383K5.1|hypothetical protein FLJ11016
202318_s_at	SENP6|SUMO1/sentrin specific peptidase 6
215022_x_at	ZNF33B|zinc finger protein 33B
212008_at	UBXD2|UBX domain containing 2
202302_s_at	FLJ11021|similar to splicing factor, arginine/serine-rich 4
203791_at	DMXL1|Dmx-like 1
212629_s_at	PKN2|protein kinase N2
212839_s_at	TROVE2|TROVE domain family, member 2
220044_x_at	CROP|cisplatin resistance-associated overexpressed protein
203804_s_at	CROP|cisplatin resistance-associated overexpressed protein
208835_s_at	CROP|cisplatin resistance-associated overexpressed protein
202629_at	APPBP2|amyloid beta precursor protein (cytoplasmic tail) binding protein 2
203306_s_at	SLC35A1|solute carrier family 35 (CMP-sialic acid transporter), member A1
201730_s_at	TPR|translocated promoter region (to activated MET oncogene)
203491_s_at	CEP57|centrosomal protein 57kDa
206500_s_at	C14ORF106|chromosome 14 open reading frame 106
215997_s_at	CUL4B|cullin 4B
208662_s_at	TTC3|tetratricopeptide repeat domain 3
202872_at	ATP6V1C1|ATPase, H+ transporting, lysosomal 42kDa, V1 subunit C1
208752_x_at	NAP1L1|nucleosome assembly protein 1-like 1
212967_x_at	NAP1L1|nucleosome assembly protein 1-like 1
203351_s_at	ORC4L|origin recognition complex, subunit 4-like (yeast)
203493_s_at	CEP57|centrosomal protein 57kDa
208296_x_at	TNFAIP8|tumor necrosis factor, alpha-induced protein 8
210260_s_at	TNFAIP8|tumor necrosis factor, alpha-induced protein 8
213168_at	SP3|Sp3 transcription factor
201637_s_at	FXR1|fragile X mental retardation, autosomal homolog 1
203533_s_at	CUL5|cullin 5
203597_s_at	WBP4|WW domain binding protein 4 (formin binding protein 21)
218521_s_at	UBE2W|ubiquitin-conjugating enzyme E2W (putative)
212582_at	OSBPL8|oxysterol binding protein-like 8
212917_x_at	RECQL|RecQ protein-like (DNA helicase Q1-like)
212368_at	ZNF292|zinc finger protein 292
203885_at	RAB21|RAB21, member RAS oncogene family
212007_at	UBXD2|UBX domain containing 2
218323_at	RHOT1|ras homolog gene family, member T1
222148_s_at	RHOT1|ras homolog gene family, member T1
202850_at	ABCD3|ATP-binding cassette, sub-family D (ALD), member 3
218757_s_at	UPF3B|UPF3 regulator of nonsense transcripts homolog B (yeast)
210346_s_at	CLK4|CDC-like kinase 4
208297_s_at	EVI5|ecotropic viral integration site 5
218197_s_at	OXR1|oxidation resistance 1
204194_at	BACH1|BTB and CNC homology 1, basic leucine zipper transcription factor 1
218142_s_at	CRBN|cereblon
221230_s_at	ARID4B|AT rich interactive domain 4B (RBP1- like) /// AT rich interactive domain 4B (RBP1- like)
212289_at	ANKRD12|ankyrin repeat domain 12
212628_at	PKN2|Protein kinase N2
209023_s_at	STAG2|stromal antigen 2
207983_s_at	STAG2|stromal antigen 2
202506_at	SSFA2|sperm specific antigen 2
212585_at	OSBPL8|oxysterol binding protein-like 8
209022_at	STAG2|stromal antigen 2
221505_at	ANP32E|acidic (leucine-rich) nuclear phosphoprotein 32 family, member E
203310_at	STXBP3|syntaxin binding protein 3
213701_at	C12ORF29|chromosome 12 open reading frame 29
202033_s_at	RB1CC1|RB1-inducible coiled-coil 1
218545_at	CCDC91|coiled-coil domain containing 91
203689_s_at	FMR1|fragile X mental retardation 1
200686_s_at	SFRS11|splicing factor, arginine/serine-rich 11
213239_at	C13ORF24|chromosome 13 open reading frame 24
209115_at	UBE1C|ubiquitin-activating enzyme E1C (UBA3 homolog, yeast)
212149_at	KIAA0143|KIAA0143 protein
202603_at	---|Clone MO-30 mRNA sequence
201664_at	SMC4|structural maintenance of chromosomes 4
209662_at	CETN3|centrin, EF-hand protein, 3 (CDC31 homolog, yeast)
218303_x_at	LOC51315|hypothetical protein LOC51315
218127_at	NFYB|nuclear transcription factor Y, beta
219421_at	TTC33|tetratricopeptide repeat domain 33
220060_s_at	C12ORF48|chromosome 12 open reading frame 48
213327_s_at	USP12|ubiquitin specific peptidase 12
218979_at	RMI1|RMI1, RecQ mediated genome instability 1, homolog (S. cerevisiae)
210568_s_at	RECQL|RecQ protein-like (DNA helicase Q1-like)
203429_s_at	C1ORF9|chromosome 1 open reading frame 9
204666_s_at	SIKE|suppressor of IKK epsilon
219399_at	LIN7C|lin-7 homolog C (C. elegans)
209475_at	USP15|ubiquitin specific peptidase 15
213518_at	PRKCI|protein kinase C, iota
209678_s_at	PRKCI|protein kinase C, iota
209677_at	PRKCI|protein kinase C, iota
212416_at	SCAMP1|secretory carrier membrane protein 1
206770_s_at	SLC35A3|solute carrier family 35 (UDP-N-acetylglucosamine (UDP-GlcNAc) transporter), member A3
218748_s_at	EXOC5|exocyst complex component 5
202006_at	PTPN12|protein tyrosine phosphatase, non-receptor type 12
211090_s_at	PRPF4B|PRP4 pre-mRNA processing factor 4 homolog B (yeast) /// PRP4 pre-mRNA processing factor 4 homolog B (yeast)
203893_at	TAF9|TAF9 RNA polymerase II, TATA box binding protein (TBP)-associated factor, 32kDa
214700_x_at	RIF1|RAP1 interacting factor homolog (yeast)
201922_at	TINP1|TGF beta-inducible nuclear protein 1
213483_at	PPWD1|peptidylprolyl isomerase domain and WD repeat containing 1
203532_x_at	CUL5|cullin 5
219303_at	C13ORF7|chromosome 13 open reading frame 7
218520_at	TBK1|TANK-binding kinase 1
211063_s_at	NCK1|NCK adaptor protein 1 /// NCK adaptor protein 1
213452_at	ZNF184|zinc finger protein 184 (Kruppel-like)
218859_s_at	C20ORF6|chromosome 20 open reading frame 6
202601_s_at	HTATSF1|HIV-1 Tat specific factor 1
203584_at	KIAA0103|KIAA0103
218135_at	ERGIC2|ERGIC and golgi 2
218395_at	ACTR6|ARP6 actin-related protein 6 homolog (yeast)
221193_s_at	ZCCHC10|zinc finger, CCHC domain containing 10
201139_s_at	SSB|Sjogren syndrome antigen B (autoantigen La)
209063_x_at	PAIP1|poly(A) binding protein interacting protein 1
210283_x_at	PAIP1 /// LOC645139 /// LOC651789|poly(A) binding protein interacting protein 1 /// similar to poly(A) binding protein interacting protein 1 isoform 1 /// similar to poly(A) binding protein interacting protein 1 isoform 1
202614_at	SLC30A9|solute carrier family 30 (zinc transporter), member 9
200915_x_at	KTN1 /// PDIA6|kinectin 1 (kinesin receptor) /// protein disulfide isomerase family A, member 6
214709_s_at	KTN1 /// PDIA6|kinectin 1 (kinesin receptor) /// protein disulfide isomerase family A, member 6
202413_s_at	USP1|ubiquitin specific peptidase 1
203341_at	CEBPZ|CCAAT/enhancer binding protein zeta
203138_at	HAT1|histone acetyltransferase 1
201138_s_at	SSB|Sjogren syndrome antigen B (autoantigen La)
213786_at	---|---
202467_s_at	COPS2|COP9 constitutive photomorphogenic homolog subunit 2 (Arabidopsis)
200976_s_at	TAX1BP1|Tax1 (human T-cell leukemia virus type I) binding protein 1
200977_s_at	TAX1BP1|Tax1 (human T-cell leukemia virus type I) binding protein 1
208993_s_at	PPIG|peptidylprolyl isomerase G (cyclophilin G)
208994_s_at	PPIG|peptidylprolyl isomerase G (cyclophilin G)
203203_s_at	KRR1|KRR1, small subunit (SSU) processome component, homolog (yeast)
200934_at	DEK|DEK oncogene (DNA binding)
203202_at	KRR1|KRR1, small subunit (SSU) processome component, homolog (yeast)
213097_s_at	ZRF1|zuotin related factor 1
201595_s_at	LEREPO4|likely ortholog of mouse immediate early response, erythropoietin 4
212885_at	MPHOSPH10|M-phase phosphoprotein 10 (U3 small nucleolar ribonucleoprotein)
212006_at	UBXD2|UBX domain containing 2
201409_s_at	PPP1CB|protein phosphatase 1, catalytic subunit, beta isoform
201408_at	PPP1CB|protein phosphatase 1, catalytic subunit, beta isoform
212721_at	SFRS12|splicing factor, arginine/serine-rich 12
219023_at	C4ORF16|chromosome 4 open reading frame 16
220083_x_at	UCHL5|ubiquitin carboxyl-terminal hydrolase L5
209861_s_at	METAP2|methionyl aminopeptidase 2
218288_s_at	MDS025|hypothetical protein MDS025
203253_s_at	HISPPD1|Histidine acid phosphatase domain containing 1
218036_x_at	NMD3|NMD3 homolog (S. cerevisiae)
214773_x_at	TIPRL|TIP41, TOR signalling pathway regulator-like (S. cerevisiae)
217987_at	ASNSD1|asparagine synthetase domain containing 1
203531_at	CUL5|cullin 5
217850_at	GNL3|guanine nucleotide binding protein-like 3 (nucleolar)
200037_s_at	CBX3 /// LOC653972|chromobox homolog 3 (HP1 gamma homolog, Drosophila) /// chromobox homolog 3 (HP1 gamma homolog, Drosophila) /// similar to chromobox homolog 3 /// similar to chromobox homolog 3
203362_s_at	MAD2L1|MAD2 mitotic arrest deficient-like 1 (yeast)
205966_at	TAF13|TAF13 RNA polymerase II, TATA box binding protein (TBP)-associated factor, 18kDa
221727_at	---|---
202557_at	STCH|stress 70 protein chaperone, microsome-associated, 60kDa
202543_s_at	GMFB|glia maturation factor, beta
205329_s_at	SNX4|sorting nexin 4
202544_at	GMFB|glia maturation factor, beta
212633_at	KIAA0776|KIAA0776
202113_s_at	SNX2|sorting nexin 2
213754_s_at	PAIP1 /// LOC645139 /// LOC651789|poly(A) binding protein interacting protein 1 /// similar to poly(A) binding protein interacting protein 1 isoform 1 /// similar to poly(A) binding protein interacting protein 1 isoform 1
201237_at	CAPZA2|capping protein (actin filament) muscle Z-line, alpha 2
211758_x_at	TXNDC9|thioredoxin domain containing 9 /// thioredoxin domain containing 9
201699_at	PSMC6|proteasome (prosome, macropain) 26S subunit, ATPase, 6
210907_s_at	PDCD10|programmed cell death 10
218351_at	COMMD8|COMM domain containing 8
201238_s_at	CAPZA2|capping protein (actin filament) muscle Z-line, alpha 2
201472_at	VBP1|von Hippel-Lindau binding protein 1
217915_s_at	C15ORF15|chromosome 15 open reading frame 15
218085_at	CHMP5|chromatin modifying protein 5
218482_at	ENY2|enhancer of yellow 2 homolog (Drosophila)
219356_s_at	CHMP5|chromatin modifying protein 5
200679_x_at	HMGB1|high-mobility group box 1
222035_s_at	PAPOLA|poly(A) polymerase alpha
218446_s_at	FAM18B|family with sequence similarity 18, member B
212410_at	EFHA1|EF-hand domain family, member A1
201955_at	CCNC|cyclin C
201407_s_at	PPP1CB|protein phosphatase 1, catalytic subunit, beta isoform
201273_s_at	SRP9|signal recognition particle 9kDa
208374_s_at	CAPZA1|capping protein (actin filament) muscle Z-line, alpha 1
208097_s_at	TXNDC1|thioredoxin domain containing 1
202933_s_at	YES1|v-yes-1 Yamaguchi sarcoma viral oncogene homolog 1
209649_at	STAM2|signal transducing adaptor molecule (SH3 domain and ITAM motif) 2
218589_at	P2RY5|purinergic receptor P2Y, G-protein coupled, 5
210639_s_at	ATG5|ATG5 autophagy related 5 homolog (S. cerevisiae)
202276_at	SHFM1|split hand/foot malformation (ectrodactyly) type 1
212833_at	LOC91137|hypothetical protein BC017169
209181_s_at	RABGGTB|Rab geranylgeranyltransferase, beta subunit
205087_at	RWDD3|RWD domain containing 3
213704_at	RABGGTB|Rab geranylgeranyltransferase, beta subunit
221593_s_at	RPL31|ribosomal protein L31
218919_at	ZFAND1|zinc finger, AN1-type domain 1
209838_at	COPS2|COP9 constitutive photomorphogenic homolog subunit 2 (Arabidopsis)
218053_at	PRPF40A|PRP40 pre-mRNA processing factor 40 homolog A (yeast)
211536_x_at	MAP3K7|mitogen-activated protein kinase kinase kinase 7
208943_s_at	TLOC1|translocation protein 1
208942_s_at	TLOC1|translocation protein 1
209780_at	PHTF2|putative homeodomain transcription factor 2
212530_at	NEK7|NIMA (never in mitosis gene a)-related kinase 7
218195_at	C6ORF211|chromosome 6 open reading frame 211
203675_at	NUCB2|nucleobindin 2
202602_s_at	HTATSF1|HIV-1 Tat specific factor 1
214363_s_at	MATR3|matrin 3
210970_s_at	IBTK|inhibitor of Bruton agammaglobulinemia tyrosine kinase
212557_at	ZNF451|zinc finger protein 451
203763_at	DYNC2LI1|dynein, cytoplasmic 2, light intermediate chain 1
218268_at	TBC1D15|TBC1 domain family, member 15
204093_at	CCNH|cyclin H
203357_s_at	CAPN7|calpain 7
203356_at	CAPN7|calpain 7
219237_s_at	DNAJB14|DnaJ (Hsp40) homolog, subfamily B, member 14
207153_s_at	GLMN|glomulin, FKBP associated protein
221751_at	SLC2A3P1|Solute carrier family 2 (facilitated glucose transporter), member 3 pseudogene 1
201018_at	EIF1AX|eukaryotic translation initiation factor 1A, X-linked
201019_s_at	EIF1AX|eukaryotic translation initiation factor 1A, X-linked
202333_s_at	UBE2B|ubiquitin-conjugating enzyme E2B (RAD6 homolog)
212927_at	SMC5|structural maintenance of chromosomes 5
219802_at	FLJ22028|hypothetical protein FLJ22028
219003_s_at	MANEA|mannosidase, endo-alpha
219487_at	BBS10|Bardet-Biedl syndrome 10
218158_s_at	APPL|adaptor protein containing pH domain, PTB domain and leucine zipper motif 1
208663_s_at	TTC3|tetratricopeptide repeat domain 3
202906_s_at	NBN|nibrin
217936_at	ARHGAP5|Rho GTPase activating protein 5
202778_s_at	ZMYM2|zinc finger, MYM-type 2
221695_s_at	MAP3K2|mitogen-activated protein kinase kinase kinase 2 /// mitogen-activated protein kinase kinase kinase 2
217985_s_at	BAZ1A|bromodomain adjacent to zinc finger domain, 1A
206288_at	PGGT1B|protein geranylgeranyltransferase type I, beta subunit
219484_at	HCFC2|host cell factor C2
206853_s_at	MAP3K7|Mitogen-activated protein kinase kinase kinase 7
204354_at	POT1|POT1 protection of telomeres 1 homolog (S. pombe)
219146_at	C17ORF42|chromosome 17 open reading frame 42
219439_at	C1GALT1|core 1 synthase, glycoprotein-N-acetylgalactosamine 3-beta-galactosyltransferase, 1
222262_s_at	ETNK1|ethanolamine kinase 1
213594_x_at	FUSIP1 /// LOC642558|FUS interacting protein (serine/arginine-rich) 1 /// similar to FUS interacting protein (serine-arginine rich) 1
202905_x_at	NBN|nibrin
217758_s_at	TM9SF3|transmembrane 9 superfamily member 3
222103_at	ATF1|Activating transcription factor 1
221510_s_at	GLS|glutaminase
212341_at	YIPF6|Yip1 domain family, member 6
202797_at	SACM1L|SAC1 suppressor of actin mutations 1-like (yeast)
212984_at	ATF2|activating transcription factor 2
221699_s_at	DDX50|DEAD (Asp-Glu-Ala-Asp) box polypeptide 50 /// DEAD (Asp-Glu-Ala-Asp) box polypeptide 50
213859_x_at	SMARCA5|SWI/SNF related, matrix associated, actin dependent regulator of chromatin, subfamily a, member 5
202303_x_at	SMARCA5|SWI/SNF related, matrix associated, actin dependent regulator of chromatin, subfamily a, member 5
207941_s_at	RBM39|RNA binding motif protein 39
213391_at	DPY19L4|dpy-19-like 4 (C. elegans)
204299_at	FUSIP1 /// LOC642558|FUS interacting protein (serine/arginine-rich) 1 /// similar to FUS interacting protein (serine-arginine rich) 1
201517_at	NCBP2|nuclear cap binding protein subunit 2, 20kDa
210458_s_at	TANK|TRAF family member-associated NFKB activator
201604_s_at	PPP1R12A|protein phosphatase 1, regulatory (inhibitor) subunit 12A
212342_at	YIPF6|Yip1 domain family, member 6
208393_s_at	RAD50|RAD50 homolog (S. cerevisiae)
212340_at	YIPF6|Yip1 domain family, member 6
211733_x_at	SCP2|sterol carrier protein 2 /// sterol carrier protein 2
203345_s_at	MTF2|metal response element binding transcription factor 2
202874_s_at	ATP6V1C1|ATPase, H+ transporting, lysosomal 42kDa, V1 subunit C1
218769_s_at	ANKRA2|ankyrin repeat, family A (RFXANK-like), 2
209648_x_at	SOCS5|suppressor of cytokine signaling 5
201296_s_at	WSB1|WD repeat and SOCS box-containing 1
218854_at	SART2|squamous cell carcinoma antigen recognized by T cells 2
219635_at	ZNF606|zinc finger protein 606
214085_x_at	GLIPR1|GLI pathogenesis-related 1 (glioma)
204221_x_at	GLIPR1|GLI pathogenesis-related 1 (glioma)
209989_at	ZNF268|zinc finger protein 268
209821_at	C9ORF26|chromosome 9 open reading frame 26 (NF-HEV)
201012_at	ANXA1|annexin A1
213623_at	KIF3A|kinesin family member 3A
219239_s_at	ZNF654|zinc finger protein 654
221546_at	PRPF18|PRP18 pre-mRNA processing factor 18 homolog (S. cerevisiae)
219292_at	THAP1|THAP domain containing, apoptosis associated protein 1
222286_at	SNAPC3|small nuclear RNA activating complex, polypeptide 3, 50kDa
207920_x_at	ZFX|zinc finger protein, X-linked
218846_at	CRSP3|cofactor required for Sp1 transcriptional activation, subunit 3, 130kDa
217886_at	EPS15|epidermal growth factor receptor pathway substrate 15
202373_s_at	RAB3GAP2|RAB3 GTPase activating protein subunit 2 (non-catalytic)
209778_at	TRIP11|thyroid hormone receptor interactor 11
204314_s_at	CREB1|cAMP responsive element binding protein 1
213355_at	ST3GAL6|ST3 beta-galactoside alpha-2,3-sialyltransferase 6
210942_s_at	ST3GAL6|ST3 beta-galactoside alpha-2,3-sialyltransferase 6
217665_at	---|CDNA FLJ25947 fis, clone JTH14708
221778_at	KIAA1718|KIAA1718 protein
201636_at	FXR1|fragile X mental retardation, autosomal homolog 1
209862_s_at	CEP57|centrosomal protein 57kDa
203492_x_at	CEP57|centrosomal protein 57kDa
219130_at	CCDC76|coiled-coil domain containing 76
217218_at	WAPAL|wings apart-like homolog (Drosophila)
206241_at	KPNA5|karyopherin alpha 5 (importin alpha 6)
209865_at	SLC35A3|solute carrier family 35 (UDP-N-acetylglucosamine (UDP-GlcNAc) transporter), member A3
209704_at	---|Full length insert cDNA clone YY61D04
217608_at	P18SRP|P18SRP protein
217947_at	CMTM6|CKLF-like MARVEL transmembrane domain containing 6
214305_s_at	SF3B1|splicing factor 3b, subunit 1, 155kDa
206532_at	---|---
218669_at	RAP2C|RAP2C, member of RAS oncogene family
204004_at	PAWR|PRKC, apoptosis, WT1, regulator
201992_s_at	KIF5B|kinesin family member 5B
201991_s_at	KIF5B|kinesin family member 5B
204841_s_at	EEA1|Early endosome antigen 1, 162kD
219976_at	HOOK1|hook homolog 1 (Drosophila)
219960_s_at	UCHL5|ubiquitin carboxyl-terminal hydrolase L5
205836_s_at	YTHDC2|YTH domain containing 2
205543_at	HSPA4L|heat shock 70kDa protein 4-like
204782_at	---|---
203261_at	DCTN6|dynactin 6
201180_s_at	GNAI3|guanine nucleotide binding protein (G protein), alpha inhibiting activity polypeptide 3
216508_x_at	HMGB1 /// HMG1L1 /// LOC644380|high-mobility group box 1 /// high-mobility group (nonhistone chromosomal) protein 1-like 1 /// similar to High mobility group protein 1-like 10 (HMG-1L10)
203016_s_at	SSX2IP|synovial sarcoma, X breakpoint 2 interacting protein
219787_s_at	ECT2|epithelial cell transforming sequence 2 oncogene
219148_at	PBK|PDZ binding kinase
203017_s_at	SSX2IP|synovial sarcoma, X breakpoint 2 interacting protein
207165_at	HMMR|hyaluronan-mediated motility receptor (RHAMM)
218663_at	NCAPG|non-SMC condensin I complex, subunit G
205034_at	CCNE2|cyclin E2
204886_at	PLK4|polo-like kinase 4 (Drosophila)
219069_at	ANKRD49|ankyrin repeat domain 49
218781_at	SMC6|structural maintenance of chromosomes 6
202950_at	CRYZ|crystallin, zeta (quinone reductase)
204572_s_at	PIN4|protein (peptidylprolyl cis/trans isomerase) NIMA-interacting, 4 (parvulin)
219662_at	C2ORF49|chromosome 2 open reading frame 49
214785_at	VPS13A|vacuolar protein sorting 13 homolog A (S. cerevisiae)
206931_at	ZNF141|zinc finger protein 141 (clone pHZ-44)
205214_at	STK17B|serine/threonine kinase 17b (apoptosis-inducing)
220038_at	SGK3|serum/glucocorticoid regulated kinase family, member 3
203176_s_at	TFAM|transcription factor A, mitochondrial
208541_x_at	TFAM|transcription factor A, mitochondrial
205246_at	PEX13|peroxisome biogenesis factor 13
216252_x_at	FAS|Fas (TNF receptor superfamily, member 6)
215719_x_at	FAS|Fas (TNF receptor superfamily, member 6)
204453_at	ZNF84|zinc finger protein 84
212919_at	DCP2|DCP2 decapping enzyme homolog (S. cerevisiae)
218478_s_at	ZCCHC8|zinc finger, CCHC domain containing 8
212763_at	CAMSAP1L1|calmodulin regulated spectrin-associated protein 1-like 1
212765_at	CAMSAP1L1|calmodulin regulated spectrin-associated protein 1-like 1
206958_s_at	UPF3A|UPF3 regulator of nonsense transcripts homolog A (yeast)
201210_at	DDX3X|DEAD (Asp-Glu-Ala-Asp) box polypeptide 3, X-linked
208901_s_at	TOP1|topoisomerase (DNA) I
208127_s_at	SOCS5|suppressor of cytokine signaling 5
202646_s_at	CSDE1|cold shock domain containing E1, RNA-binding
215596_s_at	ZNF294|zinc finger protein 294
218896_s_at	C17ORF85|chromosome 17 open reading frame 85
201024_x_at	EIF5B|eukaryotic translation initiation factor 5B
201027_s_at	EIF5B|eukaryotic translation initiation factor 5B
214314_s_at	EIF5B|eukaryotic translation initiation factor 5B
202604_x_at	ADAM10|ADAM metallopeptidase domain 10
219855_at	NUDT11|nudix (nucleoside diphosphate linked moiety X)-type motif 11
219166_at	C14ORF104|chromosome 14 open reading frame 104
218871_x_at	GALNACT-2|chondroitin sulfate GalNAcT-2
219242_at	CEP63|centrosomal protein 63kDa
218698_at	APIP|APAF1 interacting protein
220397_at	MDM1|Mdm4, transformed 3T3 cell double minute 1, p53 binding protein (mouse)
212577_at	SMCHD1|structural maintenance of chromosomes flexible hinge domain containing 1
206698_at	XK|X-linked Kx blood group (McLeod syndrome)
215886_x_at	USP12|ubiquitin specific peptidase 12
206011_at	CASP1|caspase 1, apoptosis-related cysteine peptidase (interleukin 1, beta, convertase)
209970_x_at	CASP1|caspase 1, apoptosis-related cysteine peptidase (interleukin 1, beta, convertase)
220346_at	MTHFD2L|methylenetetrahydrofolate dehydrogenase (NADP+ dependent) 2-like
219294_at	CENPQ|centromere protein Q
215172_at	PTPN20B /// PTPN20A|protein tyrosine phosphatase, non-receptor type 20B /// protein tyrosine phosphatase, non-receptor type 20A
222127_s_at	EXOC1|exocyst complex component 1
217692_at	LOC388335|Similar to RIKEN cDNA A730055C05 gene
215228_at	NHLH2|nescient helix loop helix 2
203616_at	POLB|polymerase (DNA directed), beta
221046_s_at	GTPBP8|GTP-binding protein 8 (putative)
203266_s_at	MAP2K4|mitogen-activated protein kinase kinase 4
215505_s_at	STRN3|striatin, calmodulin binding protein 3
204641_at	NEK2|NIMA (never in mitosis gene a)-related kinase 2
210320_s_at	DDX52|DEAD (Asp-Glu-Ala-Asp) box polypeptide 52
211547_s_at	PAFAH1B1|platelet-activating factor acetylhydrolase, isoform Ib, alpha subunit 45kDa
208095_s_at	SRP72|signal recognition particle 72kDa
210396_s_at	LOC440354 /// BOLA2 /// LOC595101|PI-3-kinase-related kinase SMG-1 pseudogene /// bolA-like 2 (E. coli) /// PI-3-kinase-related kinase SMG-1 pseudogene
218924_s_at	CTBS|chitobiase, di-N-acetyl-
217868_s_at	METTL9|methyltransferase like 9
202969_at	---|MRNA; cDNA DKFZp667B0924 (from clone DKFZp667B0924)
201812_s_at	TOMM7 /// LOC201725|translocase of outer mitochondrial membrane 7 homolog (yeast) /// hypothetical protein LOC201725
210908_s_at	PFDN5|prefoldin subunit 5
213687_s_at	RPL35A|ribosomal protein L35a
218654_s_at	MRPS33|mitochondrial ribosomal protein S33
219539_at	GEMIN6|gem (nuclear organelle) associated protein 6
206790_s_at	NDUFB1|NADH dehydrogenase (ubiquinone) 1 beta subcomplex, 1, 7kDa
202110_at	COX7B|cytochrome c oxidase subunit VIIb
200888_s_at	RPL23|ribosomal protein L23
200963_x_at	RPL31|ribosomal protein L31
217773_s_at	NDUFA4|NADH dehydrogenase (ubiquinone) 1 alpha subcomplex, 4, 9kDa
207783_x_at	HUWE1|HECT, UBA and WWE domain containing 1
205055_at	ITGAE|integrin, alpha E (antigen CD103, human mucosal lymphocyte antigen 1; alpha polypeptide)
209238_at	STX3|syntaxin 3
220775_s_at	UEVLD|UEV and lactate/malate dehyrogenase domains
222097_at	MZF1|myeloid zinc finger 1
205871_at	PLGLB2 /// PLGLB1 /// PLGLA1|plasminogen-like B2 /// plasminogen-like B1 /// plasminogen-like A1
210817_s_at	CALCOCO2|calcium binding and coiled-coil domain 2
220195_at	MBD5|methyl-CpG binding domain protein 5
208740_at	SAP18|Sin3A-associated protein, 18kDa
218055_s_at	WDR41|WD repeat domain 41
217615_at	LRRC37A|Leucine rich repeat containing 37A
215560_x_at	MTRF1L|Mitochondrial translational release factor 1-like
200641_s_at	YWHAZ|tyrosine 3-monooxygenase/tryptophan 5-monooxygenase activation protein, zeta polypeptide
209024_s_at	SYNCRIP|synaptotagmin binding, cytoplasmic RNA interacting protein
217832_at	SYNCRIP|synaptotagmin binding, cytoplasmic RNA interacting protein
208895_s_at	DDX18|DEAD (Asp-Glu-Ala-Asp) box polypeptide 18
204510_at	CDC7|CDC7 cell division cycle 7 (S. cerevisiae)
216902_s_at	RRN3|RRN3 RNA polymerase I transcription factor homolog (S. cerevisiae)
212470_at	SPAG9|sperm associated antigen 9
213229_at	DICER1|Dicer1, Dcr-1 homolog (Drosophila)
207686_s_at	CASP8|caspase 8, apoptosis-related cysteine peptidase
207766_at	CDKL1|cyclin-dependent kinase-like 1 (CDC2-related kinase)
202466_at	POLS|polymerase (DNA directed) sigma
219351_at	TRAPPC2|trafficking protein particle complex 2
204679_at	KCNK1|potassium channel, subfamily K, member 1
52285_f_at	CEP76|centrosomal protein 76kDa
219284_at	HSPBAP1|HSPB (heat shock 27kDa) associated protein 1
203947_at	CSTF3|cleavage stimulation factor, 3' pre-RNA, subunit 3, 77kDa
215773_x_at	PARP2|poly (ADP-ribose) polymerase family, member 2
210947_s_at	MSH3|mutS homolog 3 (E. coli)
218558_s_at	MRPL39|mitochondrial ribosomal protein L39
203925_at	GCLM|glutamate-cysteine ligase, modifier subunit
204565_at	THEM2|thioesterase superfamily member 2
212246_at	MCFD2|multiple coagulation factor deficiency 2
207988_s_at	ARPC2|actin related protein 2/3 complex, subunit 2, 34kDa
216088_s_at	PSMA7|proteasome (prosome, macropain) subunit, alpha type, 7
212111_at	STX12|syntaxin 12
212112_s_at	STX12|syntaxin 12
207030_s_at	CSRP2|cysteine and glycine-rich protein 2
209967_s_at	CREM|cAMP responsive element modulator
203596_s_at	IFIT5|interferon-induced protein with tetratricopeptide repeats 5
212010_s_at	CDV3|CDV3 homolog (mouse)
220990_s_at	TMEM49 /// MIRN21|transmembrane protein 49 /// transmembrane protein 49 /// microRNA 21 /// microRNA 21
212219_at	PSME4|proteasome (prosome, macropain) activator subunit 4
213374_x_at	HIBCH|3-hydroxyisobutyryl-Coenzyme A hydrolase
221540_x_at	GTF2H2 /// LOC651701 /// DKFZP686M0199 /// DKFZP686P18101 /// LOC653866|general transcription factor IIH, polypeptide 2, 44kDa /// similar to TFIIH basal transcription factor complex p44 subunit (Basic transcription factor 2 44 kDa subunit) (BTF2-p44) (General transcription factor IIH polypeptide 2) /// similar to TFIIH basal transcription factor complex p44 subunit (Basic transcription factor 2 …
216449_x_at	HSP90B1|heat shock protein 90kDa beta (Grp94), member 1
200599_s_at	HSP90B1|heat shock protein 90kDa beta (Grp94), member 1
210153_s_at	ME2|malic enzyme 2, NAD(+)-dependent, mitochondrial
210154_at	ME2|malic enzyme 2, NAD(+)-dependent, mitochondrial
209397_at	ME2|malic enzyme 2, NAD(+)-dependent, mitochondrial
214791_at	LOC93349|hypothetical protein BC004921
213798_s_at	CAP1|CAP, adenylate cyclase-associated protein 1 (yeast)
204457_s_at	GAS1|growth arrest-specific 1
210538_s_at	BIRC3|baculoviral IAP repeat-containing 3
206618_at	IL18R1|interleukin 18 receptor 1
222150_s_at	LOC54103|hypothetical protein LOC54103
205997_at	ADAM28|ADAM metallopeptidase domain 28
207219_at	ZNF643|zinc finger protein 643
206331_at	CALCRL|calcitonin receptor-like
202727_s_at	IFNGR1|interferon gamma receptor 1
205036_at	LSM6|LSM6 homolog, U6 small nuclear RNA associated (S. cerevisiae)
202305_s_at	FEZ2|fasciculation and elongation protein zeta 2 (zygin II)
203324_s_at	CAV2|caveolin 2
219387_at	KIAA1212|KIAA1212
208616_s_at	PTP4A2|protein tyrosine phosphatase type IVA, member 2
218718_at	PDGFC|platelet derived growth factor C
214329_x_at	TNFSF10|tumor necrosis factor (ligand) superfamily, member 10 /// tumor necrosis factor (ligand) superfamily, member 10
202687_s_at	TNFSF10|tumor necrosis factor (ligand) superfamily, member 10 /// tumor necrosis factor (ligand) superfamily, member 10
202688_at	TNFSF10|tumor necrosis factor (ligand) superfamily, member 10 /// tumor necrosis factor (ligand) superfamily, member 10
220235_s_at	C1ORF103|chromosome 1 open reading frame 103
37170_at	BMP2K|BMP2 inducible kinase
214716_at	BMP2K|BMP2 inducible kinase
212519_at	UBE2E1|ubiquitin-conjugating enzyme E2E 1 (UBC4/5 homolog, yeast)
202378_s_at	LEPROT|leptin receptor overlapping transcript
203917_at	CXADR|coxsackie virus and adenovirus receptor
220617_s_at	ZNF532|zinc finger protein 532
206483_at	LRRC6|leucine rich repeat containing 6
219720_s_at	C14ORF118|chromosome 14 open reading frame 118
222054_at	LOC664727|hypothetical protein LOC664727
207414_s_at	PCSK6|proprotein convertase subtilisin/kexin type 6
204705_x_at	ALDOB|aldolase B, fructose-bisphosphate
215927_at	MUC1|mucin 1, cell surface associated
216028_at	DKFZP564C152|DKFZP564C152 protein
204924_at	TLR2|toll-like receptor 2
222000_at	C1ORF174|chromosome 1 open reading frame 174
218586_at	C20ORF20|chromosome 20 open reading frame 20
207022_s_at	LDHC|lactate dehydrogenase C
210271_at	NEUROD2|neurogenic differentiation 2
209099_x_at	JAG1|jagged 1 (Alagille syndrome)
211565_at	SH3GL3|SH3-domain GRB2-like 3
218761_at	RNF111|ring finger protein 111
218348_s_at	ZC3H7A|zinc finger CCCH-type containing 7A
